# Supplementary material for: Evaluation of the potential food allergy risks of recombinant human lactoferrin expressed in Komagataella phaffii
Source: bioRxiv preprint, doi:10.1101/2024.01.18.576250, version 1 (2024-01-20)
Supplement: Supplemental Data [file 576250_file04.xlsx]

## Sheet: sample info
rerun of data analysis on 20231206
database now definitely contains mannosidase
removed contaminant proteins (filter)
removed proteins with fewer than 2 identifying peptides
below table for reference to PEAKS files if required
PEAKS number	sample name	include in 3-batch analysis?
74	Batch1-MSB66984A	Y
75	Batch1-MSB66984B	Y
76	Batch4-MSB66985A	Y
77	Batch4-MSB66985B	Y
78	Batch4-MSB66985C	Y
79	Batch5-MSB66986A	Y
80	Batch5-MSB66986B	Y
81	Batch5-MSB66986C	Y
82	Batch6-MSB67264A	N
83	Batch6-MSB67264B	N
84	Batch6-MSB67264C	N
85	Ferm5-MSB67265A	N
86	Ferm5-MSB67265C	N
87	Ferm5-MSB67265C	N

## Sheet: Batch1-MSB66984A
Protein Group	Protein ID	Accession	-10lgP	Coverage (%)	Coverage (%) Sample 1	Intensity Sample 1	intensity/LACTOFERRIN*100	#Peptides	#Unique	#Spec Sample 1	PTM	Avg. Mass	Description
1	1	|#CONTAM#TRFL_HUMAN|	389.15	85	85	545000000000	100	48	47	6670	Carbamidomethylation; Oxidation (M)	78182	LACTOFERRIN
3	2	|#CONTAM#K2C1_HUMAN|	266.82	46	46	1220000000		21	19	77	Carbamidomethylation; Oxidation (M)	65886	sp|#CONTAM#K2C1_HUMAN|
9	4	|#CONTAM#K1C9_HUMAN|	264.83	45	45	210000000		18	17	37	Carbamidomethylation; Oxidation (M)	62129	sp|#CONTAM#K1C9_HUMAN|
5	3	|#CONTAM#K1C10_HUMAN|	255.1	47	47	629000000		22	17	61	Carbamidomethylation; Oxidation (M)	59519	sp|#CONTAM#K1C10_HUMAN|
2	10	F2QP45	240.05	62	62	1170000000	0.214679	13	11	157	Carbamidomethylation; Oxidation (M)	40434	Fructose-bisphosphate aldolase OS=Komagataella phaffii (strain ATCC 76273 / CBS 7435 / CECT 11047 / NRRL Y-11430 / Wegner 21-1) OX=981350 GN=FBA1-2 PE=3 SV=1
4	5	C4QY07	246.81	62	62	434000000	0.079633	17	17	64		44103	Phosphoglycerate kinase OS=Komagataella phaffii (strain GS115 / ATCC 20864) OX=644223 GN=PAS_chr1-4_0292 PE=3 SV=1
4	6	F2QLH3	246.81	62	62	434000000	0.079633	17	17	64		44103	Phosphoglycerate kinase OS=Komagataella phaffii (strain ATCC 76273 / CBS 7435 / CECT 11047 / NRRL Y-11430 / Wegner 21-1) OX=981350 GN=PGK1 PE=3 SV=1
8	7	|#CONTAM#K22E_HUMAN|	218.39	31	31	171000000		17	15	40	Carbamidomethylation	65865	sp|#CONTAM#K22E_HUMAN|
10	12	C4QZS3	188.61	22	22	178000000	0.0326606	13	13	35		74214	Endoplasmic reticulum chaperone BiP OS=Komagataella phaffii (strain GS115 / ATCC 20864) OX=644223 GN=PAS_chr2-1_0140 PE=3 SV=1
12	264024	MannosidaseTR	195.8	27	27	124000000	0.0227523	10	10	19	Carbamidomethylation	64030	MannosidaseTR
19	31	F2R0H2	118.49	45	45	110000000	0.0201835	6	6	11	Oxidation (M)	12125	Cytochrome c isoform 1 OS=Komagataella phaffii (strain ATCC 76273 / CBS 7435 / CECT 11047 / NRRL Y-11430 / Wegner 21-1) OX=981350 GN=CYC1 PE=3 SV=1
19	32	C4R6L9	118.49	45	45	110000000	0.0201835	6	6	11	Oxidation (M)	12125	Cytochrome c isoform 1 OS=Komagataella phaffii (strain GS115 / ATCC 20864) OX=644223 GN=PAS_chr4_0018 PE=3 SV=1
7	24	|#CONTAM#TRYP_PIG|	175.06	29	29	3810000000		5	5	46	Oxidation (M)	24409	sp|#CONTAM#TRYP_PIG|
29	35	C4R3H3	92.67	6	6	90400000	0.0165872	2	2	6	Carbamidomethylation	31886	SCP domain-containing protein OS=Komagataella phaffii (strain GS115 / ATCC 20864) OX=644223 GN=PAS_chr3_0076 PE=4 SV=1
29	36	F2QXH5	92.67	6	6	90400000	0.0165872	2	2	6	Carbamidomethylation	31886	Extracellular protein X1 OS=Komagataella phaffii (strain ATCC 76273 / CBS 7435 / CECT 11047 / NRRL Y-11430 / Wegner 21-1) OX=981350 GN=EPX1 PE=4 SV=1
13	13	A0A1G4KQ19	159.64	30	30	58400000	0.0107156	10	10	17	Carbamidomethylation	45824	ribonuclease T2 OS=Komagataella phaffii (strain ATCC 76273 / CBS 7435 / CECT 11047 / NRRL Y-11430 / Wegner 21-1) OX=981350 GN=RNY1 PE=3 SV=1
13	14	C4QZY8	159.64	29	29	58400000	0.0107156	10	10	17	Carbamidomethylation	47077	ribonuclease T2 OS=Komagataella phaffii (strain GS115 / ATCC 20864) OX=644223 GN=PAS_chr2-1_0204 PE=3 SV=1
16	15	C4R2S1	146.84	26	26	45200000	0.00829358	9	9	13		57865	Catalase OS=Komagataella phaffii (strain GS115 / ATCC 20864) OX=644223 GN=PAS_chr2-2_0131 PE=3 SV=1
16	16	F2QR06	146.84	26	26	45200000	0.00829358	9	9	13		57865	Catalase OS=Komagataella phaffii (strain ATCC 76273 / CBS 7435 / CECT 11047 / NRRL Y-11430 / Wegner 21-1) OX=981350 GN=CTA1 PE=3 SV=1
15	21	C4R2L8	146.26	22	22	44600000	0.00818349	7	7	12	Carbamidomethylation; Oxidation (M)	50881	L-type lectin-like domain-containing protein OS=Komagataella phaffii (strain GS115 / ATCC 20864) OX=644223 GN=PAS_chr2-2_0178 PE=4 SV=1
15	22	F2QR56	146.26	22	22	44600000	0.00818349	7	7	12	Carbamidomethylation; Oxidation (M)	50881	L-type lectin-like domain-containing protein OS=Komagataella phaffii (strain ATCC 76273 / CBS 7435 / CECT 11047 / NRRL Y-11430 / Wegner 21-1) OX=981350 GN=PP7435_Chr2-0187 PE=4 SV=1
11	8	C4QZU2	191.46	24	24	41300000	0.00757798	15	15	27	Carbamidomethylation; Oxidation (M)	85839	5-methyltetrahydropteroyltriglutamate--homocysteine S-methyltransferase OS=Komagataella phaffii (strain GS115 / ATCC 20864) OX=644223 GN=PAS_chr2-1_0160 PE=3 SV=1
11	9	F2QTU9	191.46	24	24	41300000	0.00757798	15	15	27	Carbamidomethylation; Oxidation (M)	85839	5-methyltetrahydropteroyltriglutamate--homocysteine S-methyltransferase OS=Komagataella phaffii (strain ATCC 76273 / CBS 7435 / CECT 11047 / NRRL Y-11430 / Wegner 21-1) OX=981350 GN=MET6 PE=3 SV=1
17	23	|#CONTAM#K1C15_SHEEP|	126.9	16	16	9200000		7	3	14		48770	sp|#CONTAM#K1C15_SHEEP|
14	19	C4R8X7	146.6	55	55	32600000	0.00598165	8	8	16	Carbamidomethylation	15677	Superoxide dismutase [Cu-Zn] OS=Komagataella phaffii (strain GS115 / ATCC 20864) OX=644223 GN=PAS_chr4_0786 PE=3 SV=1
14	20	F2QY66	146.6	55	55	32600000	0.00598165	8	8	16	Carbamidomethylation	15677	Superoxide dismutase [Cu-Zn] OS=Komagataella phaffii (strain ATCC 76273 / CBS 7435 / CECT 11047 / NRRL Y-11430 / Wegner 21-1) OX=981350 GN=SOD1 PE=3 SV=1
18	17	C4QV89	142.33	9	9	17900000	0.0032844	7	7	10	Carbamidomethylation	100304	Heat shock protein that cooperates with Ydj1p (Hsp40) and Ssa1p (Hsp70) OS=Komagataella phaffii (strain GS115 / ATCC 20864) OX=644223 GN=PAS_chr1-3_0102 PE=3 SV=1
18	18	F2QLY3	142.33	9	9	17900000	0.0032844	7	7	10	Carbamidomethylation	100304	Heat shock protein OS=Komagataella phaffii (strain ATCC 76273 / CBS 7435 / CECT 11047 / NRRL Y-11430 / Wegner 21-1) OX=981350 GN=HSP104 PE=3 SV=1
30	25	F2QSQ9	120.73	32	32	15100000	0.00277064	4	4	7	Carbamidomethylation	23657	Uncharacterized protein OS=Komagataella phaffii (strain ATCC 76273 / CBS 7435 / CECT 11047 / NRRL Y-11430 / Wegner 21-1) OX=981350 GN=PP7435_Chr2-0752 PE=4 SV=1
30	26	C4R0Z8	120.73	32	32	15100000	0.00277064	4	4	7	Carbamidomethylation	23657	Uncharacterized protein OS=Komagataella phaffii (strain GS115 / ATCC 20864) OX=644223 GN=PAS_chr2-1_0539 PE=4 SV=1
47	43	C4R0V6	62.72	14	14	14600000	0.0026789	2	2	4		29432	Uncharacterized protein OS=Komagataella phaffii (strain GS115 / ATCC 20864) OX=644223 GN=PAS_chr2-1_0852 PE=4 SV=1
62	29	F2QYY5	103.14	10	10	14500000	0.00266055	3	3	4		45507	Aspartate aminotransferase OS=Komagataella phaffii (strain ATCC 76273 / CBS 7435 / CECT 11047 / NRRL Y-11430 / Wegner 21-1) OX=981350 GN=AAT2 PE=3 SV=2
62	30	C4R862	103.14	10	10	14500000	0.00266055	3	3	4		42440	Aminotransferase class I/classII domain-containing protein OS=Komagataella phaffii (strain GS115 / ATCC 20864) OX=644223 GN=PAS_chr4_0974 PE=3 SV=1
94	37	C4QW48	61.44	13	13	12500000	0.00229358	2	2	3	Carbamidomethylation	33398	Superoxide dismutase copper/zinc binding domain-containing protein OS=Komagataella phaffii (strain GS115 / ATCC 20864) OX=644223 GN=PAS_chr1-1_0109 PE=4 SV=1
94	38	F2QMC1	61.44	13	13	12500000	0.00229358	2	2	3	Carbamidomethylation	33398	Putative Cu/Zn superoxide dismutase OS=Komagataella phaffii (strain ATCC 76273 / CBS 7435 / CECT 11047 / NRRL Y-11430 / Wegner 21-1) OX=981350 GN=SOD200 PE=4 SV=1
39	27	C4R2Q1	108.35	11	11	11000000	0.00201835	3	3	6		37022	Type II HSP40 co-chaperone that interacts with the HSP70 protein Ssa1p OS=Komagataella phaffii (strain GS115 / ATCC 20864) OX=644223 GN=PAS_chr2-2_0151 PE=4 SV=1
6	50	|#CONTAM#TRFE_HUMAN|	72.82	3	3	40800000		2	1	19	Carbamidomethylation	77050	sp|#CONTAM#TRFE_HUMAN|
39	28	F2QR25	108.35	11	11	11000000	0.00201835	3	3	6		37022	Type II HSP40 co-chaperone OS=Komagataella phaffii (strain ATCC 76273 / CBS 7435 / CECT 11047 / NRRL Y-11430 / Wegner 21-1) OX=981350 GN=SIS1 PE=4 SV=1
97	41	C4R2M0	50.4	11	11	3170000	0.000581651	2	2	3		27251	Sedoheptulose 1 7-bisphosphatase OS=Komagataella phaffii (strain GS115 / ATCC 20864) OX=644223 GN=PAS_chr2-2_0177 PE=4 SV=1
97	42	F2QR54	50.4	11	11	3170000	0.000581651	2	2	3		27251	Sedoheptulose 1 7-bisphosphatase OS=Komagataella phaffii (strain ATCC 76273 / CBS 7435 / CECT 11047 / NRRL Y-11430 / Wegner 21-1) OX=981350 GN=SHB17 PE=4 SV=1
48	33	C4R135	76.04	11	11	2110000	0.000387156	3	3	4		32127	Xylose and arabinose reductase OS=Komagataella phaffii (strain GS115 / ATCC 20864) OX=644223 GN=PAS_chr2-1_0573 PE=4 SV=1
48	34	F2QSM2	76.04	11	11	2110000	0.000387156	3	3	4		32127	Xylose and arabinose reductase OS=Komagataella phaffii (strain ATCC 76273 / CBS 7435 / CECT 11047 / NRRL Y-11430 / Wegner 21-1) OX=981350 GN=PP7435_Chr2-0714 PE=4 SV=1
59	39	F2QV92	59.44	4	4	1370000	0.000251376	2	2	3		78887	Dihydroxyacetone synthase variant 1 OS=Komagataella phaffii (strain ATCC 76273 / CBS 7435 / CECT 11047 / NRRL Y-11430 / Wegner 21-1) OX=981350 GN=DAS1 PE=3 SV=1
111	58	|#CONTAM#RS27A_HUMAN|	65.03	6	6	11300000		1	1	3		17965	sp|#CONTAM#RS27A_HUMAN|
59	40	C4R5P8	59.44	4	4	1370000	0.000251376	2	2	3		78853	Transketolase similar to Tkl2p OS=Komagataella phaffii (strain GS115 / ATCC 20864) OX=644223 GN=PAS_chr3_0832 PE=3 SV=1
154	62	C4QW09	47.9	4	4	0	0	2	1	2		39732	Fructose-bisphosphate aldolase OS=Komagataella phaffii (strain GS115 / ATCC 20864) OX=644223 GN=PAS_chr1-1_0072 PE=3 SV=1
154	63	F2QM84	47.9	4	4	0	0	2	1	2		39732	Fructose-bisphosphate aldolase OS=Komagataella phaffii (strain ATCC 76273 / CBS 7435 / CECT 11047 / NRRL Y-11430 / Wegner 21-1) OX=981350 GN=FBA1-1 PE=3 SV=1
100	61	|#CONTAM#K1H5_HUMAN|	51.26	2	2			1	0	1		47597	sp|#CONTAM#K1H5_HUMAN|
1011	97	|#CONTAM#TAU_HUMAN|	26	1	1	2.93E5		1	1	1		78746	sp|#CONTAM#TAU_HUMAN|
139	556	|#CONTAM#CO5_HUMAN|	25.31	0	0			0	0	0		188330	sp|#CONTAM#CO5_HUMAN|
140	234	|#CONTAM#KRHB3_HUMAN|	23.51	2	2	4.42E5		1	1	1		54214	sp|#CONTAM#KRHB3_HUMAN|

## Sheet: Batch1-MSB66984B
Protein Group	Protein ID	Accession	-10lgP	Coverage (%)	Coverage (%) Sample 2	Intensity Sample 2		#Peptides	#Unique	#Spec Sample 2	PTM	Avg. Mass	Description
1	1	|#CONTAM#TRFL_HUMAN|	374.62	85	85	472000000000	100	48	47	7301	Carbamidomethylation; Oxidation (M)	78182	LACTOFERRIN
3	2	|#CONTAM#K2C1_HUMAN|	262.41	48	48	1100000000		22	20	81	Carbamidomethylation; Oxidation (M)	65886	sp|#CONTAM#K2C1_HUMAN|
5	3	|#CONTAM#K1C10_HUMAN|	260.47	54	54	571000000		25	20	65	Carbamidomethylation; Oxidation (M)	59519	sp|#CONTAM#K1C10_HUMAN|
2	10	F2QP45	235.08	65	65	836000000	0.177119	13	12	200	Carbamidomethylation; Oxidation (M)	40434	Fructose-bisphosphate aldolase OS=Komagataella phaffii (strain ATCC 76273 / CBS 7435 / CECT 11047 / NRRL Y-11430 / Wegner 21-1) OX=981350 GN=FBA1-2 PE=3 SV=1
4	5	C4QY07	247.59	60	60	296000000	0.0627119	16	16	71		44103	Phosphoglycerate kinase OS=Komagataella phaffii (strain GS115 / ATCC 20864) OX=644223 GN=PAS_chr1-4_0292 PE=3 SV=1
4	6	F2QLH3	247.59	60	60	296000000	0.0627119	16	16	71		44103	Phosphoglycerate kinase OS=Komagataella phaffii (strain ATCC 76273 / CBS 7435 / CECT 11047 / NRRL Y-11430 / Wegner 21-1) OX=981350 GN=PGK1 PE=3 SV=1
11	4	|#CONTAM#K1C9_HUMAN|	233.4	40	40	195000000		17	16	37	Carbamidomethylation; Oxidation (M)	62129	sp|#CONTAM#K1C9_HUMAN|
10	7	|#CONTAM#K22E_HUMAN|	219.82	28	28	141000000		16	13	41	Carbamidomethylation	65865	sp|#CONTAM#K22E_HUMAN|
22	36	F2QXH5	112.06	12	12	176000000	0.0372881	3	3	8	Carbamidomethylation	31886	Extracellular protein X1 OS=Komagataella phaffii (strain ATCC 76273 / CBS 7435 / CECT 11047 / NRRL Y-11430 / Wegner 21-1) OX=981350 GN=EPX1 PE=4 SV=1
22	35	C4R3H3	112.06	12	12	176000000	0.0372881	3	3	8	Carbamidomethylation	31886	SCP domain-containing protein OS=Komagataella phaffii (strain GS115 / ATCC 20864) OX=644223 GN=PAS_chr3_0076 PE=4 SV=1
13	12	C4QZS3	205.58	24	24	170000000	0.0360169	14	13	38		74214	Endoplasmic reticulum chaperone BiP OS=Komagataella phaffii (strain GS115 / ATCC 20864) OX=644223 GN=PAS_chr2-1_0140 PE=3 SV=1
16	264024	MannosidaseTR	181.51	22	22	82900000	0.0175636	9	9	15	Carbamidomethylation	64030	MannosidaseTR
7	24	|#CONTAM#TRYP_PIG|	180.53	35	35	2050000000		6	6	48	Carbamidomethylation; Oxidation (M)	24409	sp|#CONTAM#TRYP_PIG|
15	13	A0A1G4KQ19	177.33	34	34	64600000	0.0136864	11	11	25	Carbamidomethylation	45824	ribonuclease T2 OS=Komagataella phaffii (strain ATCC 76273 / CBS 7435 / CECT 11047 / NRRL Y-11430 / Wegner 21-1) OX=981350 GN=RNY1 PE=3 SV=1
15	14	C4QZY8	177.33	33	33	64600000	0.0136864	11	11	25	Carbamidomethylation	47077	ribonuclease T2 OS=Komagataella phaffii (strain GS115 / ATCC 20864) OX=644223 GN=PAS_chr2-1_0204 PE=3 SV=1
12	8	C4QZU2	194.88	28	28	58200000	0.0123305	16	16	34	Carbamidomethylation; Oxidation (M)	85839	5-methyltetrahydropteroyltriglutamate--homocysteine S-methyltransferase OS=Komagataella phaffii (strain GS115 / ATCC 20864) OX=644223 GN=PAS_chr2-1_0160 PE=3 SV=1
12	9	F2QTU9	194.88	28	28	58200000	0.0123305	16	16	34	Carbamidomethylation; Oxidation (M)	85839	5-methyltetrahydropteroyltriglutamate--homocysteine S-methyltransferase OS=Komagataella phaffii (strain ATCC 76273 / CBS 7435 / CECT 11047 / NRRL Y-11430 / Wegner 21-1) OX=981350 GN=MET6 PE=3 SV=1
25	31	F2R0H2	115.9	28	28	52000000	0.0110169	3	3	6		12125	Cytochrome c isoform 1 OS=Komagataella phaffii (strain ATCC 76273 / CBS 7435 / CECT 11047 / NRRL Y-11430 / Wegner 21-1) OX=981350 GN=CYC1 PE=3 SV=1
25	32	C4R6L9	115.9	28	28	52000000	0.0110169	3	3	6		12125	Cytochrome c isoform 1 OS=Komagataella phaffii (strain GS115 / ATCC 20864) OX=644223 GN=PAS_chr4_0018 PE=3 SV=1
18	21	C4R2L8	156.9	21	21	42000000	0.00889831	7	7	13	Carbamidomethylation	50881	L-type lectin-like domain-containing protein OS=Komagataella phaffii (strain GS115 / ATCC 20864) OX=644223 GN=PAS_chr2-2_0178 PE=4 SV=1
18	22	F2QR56	156.9	21	21	42000000	0.00889831	7	7	13	Carbamidomethylation	50881	L-type lectin-like domain-containing protein OS=Komagataella phaffii (strain ATCC 76273 / CBS 7435 / CECT 11047 / NRRL Y-11430 / Wegner 21-1) OX=981350 GN=PP7435_Chr2-0187 PE=4 SV=1
17	15	C4R2S1	159.87	26	26	41300000	0.00875	8	8	13		57865	Catalase OS=Komagataella phaffii (strain GS115 / ATCC 20864) OX=644223 GN=PAS_chr2-2_0131 PE=3 SV=1
17	16	F2QR06	159.87	26	26	41300000	0.00875	8	8	13		57865	Catalase OS=Komagataella phaffii (strain ATCC 76273 / CBS 7435 / CECT 11047 / NRRL Y-11430 / Wegner 21-1) OX=981350 GN=CTA1 PE=3 SV=1
19	19	C4R8X7	144.33	44	44	23100000	0.00489407	5	5	10	Carbamidomethylation	15677	Superoxide dismutase [Cu-Zn] OS=Komagataella phaffii (strain GS115 / ATCC 20864) OX=644223 GN=PAS_chr4_0786 PE=3 SV=1
19	20	F2QY66	144.33	44	44	23100000	0.00489407	5	5	10	Carbamidomethylation	15677	Superoxide dismutase [Cu-Zn] OS=Komagataella phaffii (strain ATCC 76273 / CBS 7435 / CECT 11047 / NRRL Y-11430 / Wegner 21-1) OX=981350 GN=SOD1 PE=3 SV=1
20	17	C4QV89	134.63	8	8	21800000	0.00461864	6	6	14	Carbamidomethylation	100304	Heat shock protein that cooperates with Ydj1p (Hsp40) and Ssa1p (Hsp70) OS=Komagataella phaffii (strain GS115 / ATCC 20864) OX=644223 GN=PAS_chr1-3_0102 PE=3 SV=1
20	18	F2QLY3	134.63	8	8	21800000	0.00461864	6	6	14	Carbamidomethylation	100304	Heat shock protein OS=Komagataella phaffii (strain ATCC 76273 / CBS 7435 / CECT 11047 / NRRL Y-11430 / Wegner 21-1) OX=981350 GN=HSP104 PE=3 SV=1
21	23	|#CONTAM#K1C15_SHEEP|	121.22	10	10	4170000		5	1	11		48770	sp|#CONTAM#K1C15_SHEEP|
45	25	F2QSQ9	147.81	32	32	19400000	0.00411017	4	4	5	Carbamidomethylation	23657	Uncharacterized protein OS=Komagataella phaffii (strain ATCC 76273 / CBS 7435 / CECT 11047 / NRRL Y-11430 / Wegner 21-1) OX=981350 GN=PP7435_Chr2-0752 PE=4 SV=1
45	26	C4R0Z8	147.81	32	32	19400000	0.00411017	4	4	5	Carbamidomethylation	23657	Uncharacterized protein OS=Komagataella phaffii (strain GS115 / ATCC 20864) OX=644223 GN=PAS_chr2-1_0539 PE=4 SV=1
37	30	C4R862	109.62	10	10	17900000	0.00379237	3	3	6		42440	Aminotransferase class I/classII domain-containing protein OS=Komagataella phaffii (strain GS115 / ATCC 20864) OX=644223 GN=PAS_chr4_0974 PE=3 SV=1
37	29	F2QYY5	109.62	10	10	17900000	0.00379237	3	3	6		45507	Aspartate aminotransferase OS=Komagataella phaffii (strain ATCC 76273 / CBS 7435 / CECT 11047 / NRRL Y-11430 / Wegner 21-1) OX=981350 GN=AAT2 PE=3 SV=2
122	37	C4QW48	63.22	13	13	10800000	0.00228814	2	2	3	Carbamidomethylation	33398	Superoxide dismutase copper/zinc binding domain-containing protein OS=Komagataella phaffii (strain GS115 / ATCC 20864) OX=644223 GN=PAS_chr1-1_0109 PE=4 SV=1
122	38	F2QMC1	63.22	13	13	10800000	0.00228814	2	2	3	Carbamidomethylation	33398	Putative Cu/Zn superoxide dismutase OS=Komagataella phaffii (strain ATCC 76273 / CBS 7435 / CECT 11047 / NRRL Y-11430 / Wegner 21-1) OX=981350 GN=SOD200 PE=4 SV=1
46	43	C4R0V6	67.36	14	14	10200000	0.00216102	2	2	5		29432	Uncharacterized protein OS=Komagataella phaffii (strain GS115 / ATCC 20864) OX=644223 GN=PAS_chr2-1_0852 PE=4 SV=1
244	1230	C4QVC4	35.45	7	7	8350000	0.00176907	2	2	2	Carbamidomethylation	37035	Molecular chaperone OS=Komagataella phaffii (strain GS115 / ATCC 20864) OX=644223 GN=PAS_chr1-3_0137 PE=3 SV=1
244	1231	F2QM18	35.45	7	7	8350000	0.00176907	2	2	2	Carbamidomethylation	37035	F1 sector of mitochondrial F1F0 ATP synthase assembly OS=Komagataella phaffii (strain ATCC 76273 / CBS 7435 / CECT 11047 / NRRL Y-11430 / Wegner 21-1) OX=981350 GN=ATP11 PE=3 SV=1
30	28	F2QR25	136.91	18	18	3830000	0.000811441	5	5	8		37022	Type II HSP40 co-chaperone OS=Komagataella phaffii (strain ATCC 76273 / CBS 7435 / CECT 11047 / NRRL Y-11430 / Wegner 21-1) OX=981350 GN=SIS1 PE=4 SV=1
30	27	C4R2Q1	136.91	18	18	3830000	0.000811441	5	5	8		37022	Type II HSP40 co-chaperone that interacts with the HSP70 protein Ssa1p OS=Komagataella phaffii (strain GS115 / ATCC 20864) OX=644223 GN=PAS_chr2-2_0151 PE=4 SV=1
121	42	F2QR54	58.55	11	11	2430000	0.000514831	2	2	3		27251	Sedoheptulose 1 7-bisphosphatase OS=Komagataella phaffii (strain ATCC 76273 / CBS 7435 / CECT 11047 / NRRL Y-11430 / Wegner 21-1) OX=981350 GN=SHB17 PE=4 SV=1
121	41	C4R2M0	58.55	11	11	2430000	0.000514831	2	2	3		27251	Sedoheptulose 1 7-bisphosphatase OS=Komagataella phaffii (strain GS115 / ATCC 20864) OX=644223 GN=PAS_chr2-2_0177 PE=4 SV=1
110	62	C4QW09	64.38	8	8	2330000	0.000493644	2	2	2		39732	Fructose-bisphosphate aldolase OS=Komagataella phaffii (strain GS115 / ATCC 20864) OX=644223 GN=PAS_chr1-1_0072 PE=3 SV=1
110	63	F2QM84	64.38	8	8	2330000	0.000493644	2	2	2		39732	Fructose-bisphosphate aldolase OS=Komagataella phaffii (strain ATCC 76273 / CBS 7435 / CECT 11047 / NRRL Y-11430 / Wegner 21-1) OX=981350 GN=FBA1-1 PE=3 SV=1
6	50	|#CONTAM#TRFE_HUMAN|	62.75	3	3	49900000		2	1	20	Carbamidomethylation	77050	sp|#CONTAM#TRFE_HUMAN|
275	1246	F2QPX0	43.17	2	2	1510000	0.000319915	2	2	2		114856	FACT complex subunit OS=Komagataella phaffii (strain ATCC 76273 / CBS 7435 / CECT 11047 / NRRL Y-11430 / Wegner 21-1) OX=981350 GN=SPT16 PE=1 SV=1
275	1247	C4QYQ8	43.17	2	2	1510000	0.000319915	2	2	2		114856	FACT complex subunit OS=Komagataella phaffii (strain GS115 / ATCC 20864) OX=644223 GN=PAS_chr1-4_0529 PE=1 SV=1
57	66	|#CONTAM#KRHB4_HUMAN|	49.69	2	2			2	0	4		64895	sp|#CONTAM#KRHB4_HUMAN|
127	64	|#CONTAM#K1H6_HUMAN|	48.89	1	1			1	0	1		52247	sp|#CONTAM#K1H6_HUMAN|
71	58	|#CONTAM#RS27A_HUMAN|	45.6	6	6	5440000		1	1	4		17965	sp|#CONTAM#RS27A_HUMAN|
259	1832	|#CONTAM#K2M2_SHEEP|	32.39	1	1			1	0	1		53682	sp|#CONTAM#K2M2_SHEEP|
170	682	|#CONTAM#KRHB1_HUMAN|	31.84	1	1			1	0	1		54971	sp|#CONTAM#KRHB1_HUMAN|

## Sheet: Batch4-MSB66985A
Protein Group	Protein ID	Accession	-10lgP	Coverage (%)	Coverage (%) Sample 3	Intensity Sample 3		#Peptides	#Unique	#Spec Sample 3	PTM	Avg. Mass	Description
1	1	|#CONTAM#TRFL_HUMAN|	372.25	85	85	530000000000	100	48	47	7512	Carbamidomethylation; Oxidation (M)	78182	LACTOFERRIN
2	10	F2QP45	216.35	57	57	413000000	0.0779245	12	11	139	Carbamidomethylation; Oxidation (M)	40434	Fructose-bisphosphate aldolase OS=Komagataella phaffii (strain ATCC 76273 / CBS 7435 / CECT 11047 / NRRL Y-11430 / Wegner 21-1) OX=981350 GN=FBA1-2 PE=3 SV=1
8	264024	MannosidaseTR	217.7	30	30	394000000	0.0743396	12	12	38	Carbamidomethylation	64030	MannosidaseTR
5	12	C4QZS3	218.07	23	23	304000000	0.0573585	14	13	55	Oxidation (M)	74214	Endoplasmic reticulum chaperone BiP OS=Komagataella phaffii (strain GS115 / ATCC 20864) OX=644223 GN=PAS_chr2-1_0140 PE=3 SV=1
3	5	C4QY07	255.18	63	63	284000000	0.0535849	18	18	74	Oxidation (M)	44103	Phosphoglycerate kinase OS=Komagataella phaffii (strain GS115 / ATCC 20864) OX=644223 GN=PAS_chr1-4_0292 PE=3 SV=1
3	6	F2QLH3	255.18	63	63	284000000	0.0535849	18	18	74	Oxidation (M)	44103	Phosphoglycerate kinase OS=Komagataella phaffii (strain ATCC 76273 / CBS 7435 / CECT 11047 / NRRL Y-11430 / Wegner 21-1) OX=981350 GN=PGK1 PE=3 SV=1
21	36	F2QXH5	109.87	12	12	256000000	0.0483019	3	3	8	Carbamidomethylation	31886	Extracellular protein X1 OS=Komagataella phaffii (strain ATCC 76273 / CBS 7435 / CECT 11047 / NRRL Y-11430 / Wegner 21-1) OX=981350 GN=EPX1 PE=4 SV=1
21	35	C4R3H3	109.87	12	12	256000000	0.0483019	3	3	8	Carbamidomethylation	31886	SCP domain-containing protein OS=Komagataella phaffii (strain GS115 / ATCC 20864) OX=644223 GN=PAS_chr3_0076 PE=4 SV=1
10	15	C4R2S1	207.84	32	32	119000000	0.0224528	14	14	29		57865	Catalase OS=Komagataella phaffii (strain GS115 / ATCC 20864) OX=644223 GN=PAS_chr2-2_0131 PE=3 SV=1
10	16	F2QR06	207.84	32	32	119000000	0.0224528	14	14	29		57865	Catalase OS=Komagataella phaffii (strain ATCC 76273 / CBS 7435 / CECT 11047 / NRRL Y-11430 / Wegner 21-1) OX=981350 GN=CTA1 PE=3 SV=1
12	2	|#CONTAM#K2C1_HUMAN|	207.06	31	31	82500000		15	14	28	Carbamidomethylation	65886	sp|#CONTAM#K2C1_HUMAN|
13	19	C4R8X7	194.95	81	81	111000000	0.0209434	11	11	25	Carbamidomethylation	15677	Superoxide dismutase [Cu-Zn] OS=Komagataella phaffii (strain GS115 / ATCC 20864) OX=644223 GN=PAS_chr4_0786 PE=3 SV=1
13	20	F2QY66	194.95	81	81	111000000	0.0209434	11	11	25	Carbamidomethylation	15677	Superoxide dismutase [Cu-Zn] OS=Komagataella phaffii (strain ATCC 76273 / CBS 7435 / CECT 11047 / NRRL Y-11430 / Wegner 21-1) OX=981350 GN=SOD1 PE=3 SV=1
4	24	|#CONTAM#TRYP_PIG|	172.03	29	29	3220000000		5	4	55	Oxidation (M)	24409	sp|#CONTAM#TRYP_PIG|
16	3	|#CONTAM#K1C10_HUMAN|	166.21	20	20	44200000		10	8	19		59519	sp|#CONTAM#K1C10_HUMAN|
17	7	|#CONTAM#K22E_HUMAN|	163.71	13	13	12100000		7	6	14		65865	sp|#CONTAM#K22E_HUMAN|
9	8	C4QZU2	212.97	34	34	65700000	0.0123962	21	21	37	Carbamidomethylation; Oxidation (M)	85839	5-methyltetrahydropteroyltriglutamate--homocysteine S-methyltransferase OS=Komagataella phaffii (strain GS115 / ATCC 20864) OX=644223 GN=PAS_chr2-1_0160 PE=3 SV=1
9	9	F2QTU9	212.97	34	34	65700000	0.0123962	21	21	37	Carbamidomethylation; Oxidation (M)	85839	5-methyltetrahydropteroyltriglutamate--homocysteine S-methyltransferase OS=Komagataella phaffii (strain ATCC 76273 / CBS 7435 / CECT 11047 / NRRL Y-11430 / Wegner 21-1) OX=981350 GN=MET6 PE=3 SV=1
15	13	A0A1G4KQ19	163.49	31	31	51500000	0.00971698	10	10	20	Carbamidomethylation	45824	ribonuclease T2 OS=Komagataella phaffii (strain ATCC 76273 / CBS 7435 / CECT 11047 / NRRL Y-11430 / Wegner 21-1) OX=981350 GN=RNY1 PE=3 SV=1
15	14	C4QZY8	163.49	31	31	51500000	0.00971698	10	10	20	Carbamidomethylation	47077	ribonuclease T2 OS=Komagataella phaffii (strain GS115 / ATCC 20864) OX=644223 GN=PAS_chr2-1_0204 PE=3 SV=1
26	14247	F2QUR1	131.38	9	9	33900000	0.00639623	4	4	9	Carbamidomethylation	71659	Endochitinase OS=Komagataella phaffii (strain ATCC 76273 / CBS 7435 / CECT 11047 / NRRL Y-11430 / Wegner 21-1) OX=981350 GN=CTS1 PE=4 SV=1
40	25	F2QSQ9	120.67	20	20	32400000	0.00611321	4	4	6	Carbamidomethylation	23657	Uncharacterized protein OS=Komagataella phaffii (strain ATCC 76273 / CBS 7435 / CECT 11047 / NRRL Y-11430 / Wegner 21-1) OX=981350 GN=PP7435_Chr2-0752 PE=4 SV=1
40	26	C4R0Z8	120.67	20	20	32400000	0.00611321	4	4	6	Carbamidomethylation	23657	Uncharacterized protein OS=Komagataella phaffii (strain GS115 / ATCC 20864) OX=644223 GN=PAS_chr2-1_0539 PE=4 SV=1
18	45	C4R4I2	138.29	16	16	26100000	0.00492453	6	6	12	Carbamidomethylation	62370	Metalloprotease with similarity to the zinc carboxypeptidase family OS=Komagataella phaffii (strain GS115 / ATCC 20864) OX=644223 GN=PAS_chr3_0419 PE=3 SV=1
18	44	F2QWG9	138.29	14	14	26100000	0.00492453	6	6	12	Carbamidomethylation	67499	Putative metalloprotease OS=Komagataella phaffii (strain ATCC 76273 / CBS 7435 / CECT 11047 / NRRL Y-11430 / Wegner 21-1) OX=981350 GN=ECM14 PE=3 SV=1
128	5590	C4QYF3	72.99	10	10	18600000	0.00350943	2	2	2		33946	Endo-beta-1 3-glucanase major protein of the cell wall involved in cell wall maintenance OS=Komagataella phaffii (strain GS115 / ATCC 20864) OX=644223 GN=PAS_chr1-4_0426 PE=3 SV=1
128	5589	F2QPL8	72.99	10	10	18600000	0.00350943	2	2	2		33946	Endo-beta-1 3-glucanase OS=Komagataella phaffii (strain ATCC 76273 / CBS 7435 / CECT 11047 / NRRL Y-11430 / Wegner 21-1) OX=981350 GN=BGL2 PE=3 SV=1
39	20372	C4QVL4	90.77	8	8	12100000	0.00228302	3	3	6	Carbamidomethylation	57291	1 3-beta-glucanosyltransferase OS=Komagataella phaffii (strain GS115 / ATCC 20864) OX=644223 GN=PAS_chr1-3_0226 PE=3 SV=1
39	5991	F2QNF8	90.77	8	8	12100000	0.00228302	3	3	6	Carbamidomethylation	57291	1 3-beta-glucanosyltransferase OS=Komagataella phaffii (strain ATCC 76273 / CBS 7435 / CECT 11047 / NRRL Y-11430 / Wegner 21-1) OX=981350 GN=GAS1-1 PE=3 SV=1
38	15897	C4R0Q7	126.32	11	11	9740000	0.00183774	4	4	7	Carbamidomethylation	47837	Major exo-1 3-beta-glucanase of the cell wall involved in cell wall beta-glucan assembly OS=Komagataella phaffii (strain GS115 / ATCC 20864) OX=644223 GN=PAS_chr2-1_0454 PE=3 SV=1
47	21	C4R2L8	128.94	14	14	9180000	0.00173208	4	4	6	Carbamidomethylation	50881	L-type lectin-like domain-containing protein OS=Komagataella phaffii (strain GS115 / ATCC 20864) OX=644223 GN=PAS_chr2-2_0178 PE=4 SV=1
47	22	F2QR56	128.94	14	14	9180000	0.00173208	4	4	6	Carbamidomethylation	50881	L-type lectin-like domain-containing protein OS=Komagataella phaffii (strain ATCC 76273 / CBS 7435 / CECT 11047 / NRRL Y-11430 / Wegner 21-1) OX=981350 GN=PP7435_Chr2-0187 PE=4 SV=1
20	17	C4QV89	130.36	9	9	8230000	0.00155283	7	7	11	Carbamidomethylation	100304	Heat shock protein that cooperates with Ydj1p (Hsp40) and Ssa1p (Hsp70) OS=Komagataella phaffii (strain GS115 / ATCC 20864) OX=644223 GN=PAS_chr1-3_0102 PE=3 SV=1
20	18	F2QLY3	130.36	9	9	8230000	0.00155283	7	7	11	Carbamidomethylation	100304	Heat shock protein OS=Komagataella phaffii (strain ATCC 76273 / CBS 7435 / CECT 11047 / NRRL Y-11430 / Wegner 21-1) OX=981350 GN=HSP104 PE=3 SV=1
64	8501	C4R2Z5	114.45	13	13	8130000	0.00153396	4	4	5	Carbamidomethylation	44996	Protein of the SUN family (Sim1p Uth1p Nca3p Sun4p) that may participate in DNA replication OS=Komagataella phaffii (strain GS115 / ATCC 20864) OX=644223 GN=PAS_chr2-2_0064 PE=3 SV=1
64	20371	F2QQT7	114.45	13	13	8130000	0.00153396	4	4	5	Carbamidomethylation	44996	Putative glucanase OS=Komagataella phaffii (strain ATCC 76273 / CBS 7435 / CECT 11047 / NRRL Y-11430 / Wegner 21-1) OX=981350 GN=SUN4 PE=3 SV=1
36	4	|#CONTAM#K1C9_HUMAN|	109.22	11	11	2160000		5	4	6		62129	sp|#CONTAM#K1C9_HUMAN|
65	30	C4R862	101.17	9	9	8070000	0.00152264	3	3	5		42440	Aminotransferase class I/classII domain-containing protein OS=Komagataella phaffii (strain GS115 / ATCC 20864) OX=644223 GN=PAS_chr4_0974 PE=3 SV=1
65	29	F2QYY5	101.17	9	9	8070000	0.00152264	3	3	5		45507	Aspartate aminotransferase OS=Komagataella phaffii (strain ATCC 76273 / CBS 7435 / CECT 11047 / NRRL Y-11430 / Wegner 21-1) OX=981350 GN=AAT2 PE=3 SV=2
59	42	F2QR54	113.23	18	18	4290000	0.000809434	3	3	5		27251	Sedoheptulose 1 7-bisphosphatase OS=Komagataella phaffii (strain ATCC 76273 / CBS 7435 / CECT 11047 / NRRL Y-11430 / Wegner 21-1) OX=981350 GN=SHB17 PE=4 SV=1
59	41	C4R2M0	113.23	18	18	4290000	0.000809434	3	3	5		27251	Sedoheptulose 1 7-bisphosphatase OS=Komagataella phaffii (strain GS115 / ATCC 20864) OX=644223 GN=PAS_chr2-2_0177 PE=4 SV=1
124	59	C4R5T8	53.67	5	5	3430000	0.00064717	2	2	3		38337	fructose-bisphosphatase OS=Komagataella phaffii (strain GS115 / ATCC 20864) OX=644223 GN=PAS_chr3_0868 PE=3 SV=1
124	60	F2QV51	53.67	5	5	3430000	0.00064717	2	2	3		38337	fructose-bisphosphatase OS=Komagataella phaffii (strain ATCC 76273 / CBS 7435 / CECT 11047 / NRRL Y-11430 / Wegner 21-1) OX=981350 GN=FBP1 PE=3 SV=1
85	28	F2QR25	70.89	11	11	3390000	0.000639623	3	3	3		37022	Type II HSP40 co-chaperone OS=Komagataella phaffii (strain ATCC 76273 / CBS 7435 / CECT 11047 / NRRL Y-11430 / Wegner 21-1) OX=981350 GN=SIS1 PE=4 SV=1
85	27	C4R2Q1	70.89	11	11	3390000	0.000639623	3	3	3		37022	Type II HSP40 co-chaperone that interacts with the HSP70 protein Ssa1p OS=Komagataella phaffii (strain GS115 / ATCC 20864) OX=644223 GN=PAS_chr2-2_0151 PE=4 SV=1
44	23	|#CONTAM#K1C15_SHEEP|	72.5	5	5	720000		2	1	3		48770	sp|#CONTAM#K1C15_SHEEP|
62	33	C4R135	68.96	8	8	2340000	0.000441509	2	2	3		32127	Xylose and arabinose reductase OS=Komagataella phaffii (strain GS115 / ATCC 20864) OX=644223 GN=PAS_chr2-1_0573 PE=4 SV=1
62	34	F2QSM2	68.96	8	8	2340000	0.000441509	2	2	3		32127	Xylose and arabinose reductase OS=Komagataella phaffii (strain ATCC 76273 / CBS 7435 / CECT 11047 / NRRL Y-11430 / Wegner 21-1) OX=981350 GN=PP7435_Chr2-0714 PE=4 SV=1
259	31	F2R0H2	53	18	18	2310000	0.000435849	2	2	2		12125	Cytochrome c isoform 1 OS=Komagataella phaffii (strain ATCC 76273 / CBS 7435 / CECT 11047 / NRRL Y-11430 / Wegner 21-1) OX=981350 GN=CYC1 PE=3 SV=1
259	32	C4R6L9	53	18	18	2310000	0.000435849	2	2	2		12125	Cytochrome c isoform 1 OS=Komagataella phaffii (strain GS115 / ATCC 20864) OX=644223 GN=PAS_chr4_0018 PE=3 SV=1
139	4562	C4R1A4	51.67	7	7	1560000	0.00029434	2	2	2		36869	Serine/threonine-protein phosphatase OS=Komagataella phaffii (strain GS115 / ATCC 20864) OX=644223 GN=PAS_chr2-1_0635 PE=3 SV=1
139	4563	F2QSF4	51.67	7	7	1560000	0.00029434	2	2	2		36869	Serine/threonine-protein phosphatase OS=Komagataella phaffii (strain ATCC 76273 / CBS 7435 / CECT 11047 / NRRL Y-11430 / Wegner 21-1) OX=981350 GN=GLC7 PE=3 SV=1
30	46	F2QX14	94.63	3	3	1360000	0.000256604	2	1	7		70767	ATPase involved in protein folding OS=Komagataella phaffii (strain ATCC 76273 / CBS 7435 / CECT 11047 / NRRL Y-11430 / Wegner 21-1) OX=981350 GN=SSA3 PE=3 SV=1
30	47	C4R3X8	94.63	3	3	1360000	0.000256604	2	1	7		70767	ATPase involved in protein folding and the response to stress OS=Komagataella phaffii (strain GS115 / ATCC 20864) OX=644223 GN=PAS_chr3_0230 PE=3 SV=1
84	281	F2QQ27	117.52	10	10	981000	0.000185094	3	3	3		51236	Putative lectin-like protein OS=Komagataella phaffii (strain ATCC 76273 / CBS 7435 / CECT 11047 / NRRL Y-11430 / Wegner 21-1) OX=981350 GN=FLO5-1 PE=4 SV=1
84	282	C4QYW7	117.52	10	10	981000	0.000185094	3	3	3		51236	Lectin-like protein with similarity to Flo1p thought to be expressed and involved in flocculation OS=Komagataella phaffii (strain GS115 / ATCC 20864) OX=644223 GN=PAS_chr1-4_0584 PE=4 SV=1
49	58	|#CONTAM#RS27A_HUMAN|	65.07	6	6	6750000		1	1	5		17965	sp|#CONTAM#RS27A_HUMAN|
113	7038	F2QZA3	71.68	8	8	807000	0.000152264	2	2	2		44092	alanine--glyoxylate transaminase OS=Komagataella phaffii (strain ATCC 76273 / CBS 7435 / CECT 11047 / NRRL Y-11430 / Wegner 21-1) OX=981350 GN=AGX1 PE=3 SV=1
113	7039	C4R7U0	71.68	8	8	807000	0.000152264	2	2	2		45429	alanine--glyoxylate transaminase OS=Komagataella phaffii (strain GS115 / ATCC 20864) OX=644223 GN=PAS_chr4_0416 PE=3 SV=1
6	50	|#CONTAM#TRFE_HUMAN|	44.18	2	2	2.82E7		2	1	19	Carbamidomethylation	77050	sp|#CONTAM#TRFE_HUMAN|
309	72	|#CONTAM#TRY1_BOVIN|	39.01	3	3			1	0	1		25425	sp|#CONTAM#TRY1_BOVIN|
126	988	|#CONTAM#ANT3_HUMAN|	26.33	0	0			0	0	0		52602	sp|#CONTAM#ANT3_HUMAN|

## Sheet: Batch4-MSB66985B
Protein Group	Protein ID	Accession	-10lgP	Coverage (%)	Coverage (%) Sample 4	Intensity Sample 4		#Peptides	#Unique	#Spec Sample 4	PTM	Avg. Mass	Description
1	1	|#CONTAM#TRFL_HUMAN|	376.06	86	86	487000000000	100	49	48	7461	Carbamidomethylation; Oxidation (M)	78182	LACTOFERRIN
10	264024	MannosidaseTR	223.56	44	44	368000000	0.0755647	14	14	39	Carbamidomethylation	64030	MannosidaseTR
2	10	F2QP45	225.55	62	62	352000000	0.0722793	13	12	133	Carbamidomethylation; Oxidation (M)	40434	Fructose-bisphosphate aldolase OS=Komagataella phaffii (strain ATCC 76273 / CBS 7435 / CECT 11047 / NRRL Y-11430 / Wegner 21-1) OX=981350 GN=FBA1-2 PE=3 SV=1
5	12	C4QZS3	218.64	25	25	284000000	0.0583162	15	14	54	Oxidation (M)	74214	Endoplasmic reticulum chaperone BiP OS=Komagataella phaffii (strain GS115 / ATCC 20864) OX=644223 GN=PAS_chr2-1_0140 PE=3 SV=1
3	5	C4QY07	251.48	64	64	279000000	0.0572895	17	17	63		44103	Phosphoglycerate kinase OS=Komagataella phaffii (strain GS115 / ATCC 20864) OX=644223 GN=PAS_chr1-4_0292 PE=3 SV=1
12	2	|#CONTAM#K2C1_HUMAN|	218.87	37	37	80700000		17	15	33	Carbamidomethylation	65886	sp|#CONTAM#K2C1_HUMAN|
3	6	F2QLH3	251.48	64	64	279000000	0.0572895	17	17	63		44103	Phosphoglycerate kinase OS=Komagataella phaffii (strain ATCC 76273 / CBS 7435 / CECT 11047 / NRRL Y-11430 / Wegner 21-1) OX=981350 GN=PGK1 PE=3 SV=1
20	36	F2QXH5	116.13	12	12	207000000	0.0425051	3	3	10	Carbamidomethylation	31886	Extracellular protein X1 OS=Komagataella phaffii (strain ATCC 76273 / CBS 7435 / CECT 11047 / NRRL Y-11430 / Wegner 21-1) OX=981350 GN=EPX1 PE=4 SV=1
20	35	C4R3H3	116.13	12	12	207000000	0.0425051	3	3	10	Carbamidomethylation	31886	SCP domain-containing protein OS=Komagataella phaffii (strain GS115 / ATCC 20864) OX=644223 GN=PAS_chr3_0076 PE=4 SV=1
11	15	C4R2S1	212.45	38	38	119000000	0.0244353	15	15	32		57865	Catalase OS=Komagataella phaffii (strain GS115 / ATCC 20864) OX=644223 GN=PAS_chr2-2_0131 PE=3 SV=1
11	16	F2QR06	212.45	38	38	119000000	0.0244353	15	15	32		57865	Catalase OS=Komagataella phaffii (strain ATCC 76273 / CBS 7435 / CECT 11047 / NRRL Y-11430 / Wegner 21-1) OX=981350 GN=CTA1 PE=3 SV=1
14	19	C4R8X7	185.92	75	75	115000000	0.023614	10	10	22	Carbamidomethylation	15677	Superoxide dismutase [Cu-Zn] OS=Komagataella phaffii (strain GS115 / ATCC 20864) OX=644223 GN=PAS_chr4_0786 PE=3 SV=1
14	20	F2QY66	185.92	75	75	115000000	0.023614	10	10	22	Carbamidomethylation	15677	Superoxide dismutase [Cu-Zn] OS=Komagataella phaffii (strain ATCC 76273 / CBS 7435 / CECT 11047 / NRRL Y-11430 / Wegner 21-1) OX=981350 GN=SOD1 PE=3 SV=1
15	3	|#CONTAM#K1C10_HUMAN|	177.06	27	27	47100000		12	10	20	Carbamidomethylation	59519	sp|#CONTAM#K1C10_HUMAN|
4	24	|#CONTAM#TRYP_PIG|	170.42	32	32	3370000000		5	5	51	Carbamidomethylation; Oxidation (M)	24409	sp|#CONTAM#TRYP_PIG|
9	8	C4QZU2	194.16	36	36	55400000	0.0113758	22	21	38	Carbamidomethylation; Oxidation (M)	85839	5-methyltetrahydropteroyltriglutamate--homocysteine S-methyltransferase OS=Komagataella phaffii (strain GS115 / ATCC 20864) OX=644223 GN=PAS_chr2-1_0160 PE=3 SV=1
9	9	F2QTU9	194.16	36	36	55400000	0.0113758	22	21	38	Carbamidomethylation; Oxidation (M)	85839	5-methyltetrahydropteroyltriglutamate--homocysteine S-methyltransferase OS=Komagataella phaffii (strain ATCC 76273 / CBS 7435 / CECT 11047 / NRRL Y-11430 / Wegner 21-1) OX=981350 GN=MET6 PE=3 SV=1
90	25	F2QSQ9	116.94	17	17	43700000	0.00897331	3	3	4	Carbamidomethylation	23657	Uncharacterized protein OS=Komagataella phaffii (strain ATCC 76273 / CBS 7435 / CECT 11047 / NRRL Y-11430 / Wegner 21-1) OX=981350 GN=PP7435_Chr2-0752 PE=4 SV=1
90	26	C4R0Z8	116.94	17	17	43700000	0.00897331	3	3	4	Carbamidomethylation	23657	Uncharacterized protein OS=Komagataella phaffii (strain GS115 / ATCC 20864) OX=644223 GN=PAS_chr2-1_0539 PE=4 SV=1
16	7	|#CONTAM#K22E_HUMAN|	147.6	9	9	13900000		5	4	12		65865	sp|#CONTAM#K22E_HUMAN|
17	13	A0A1G4KQ19	164.97	30	30	39200000	0.00804928	10	10	17	Carbamidomethylation	45824	ribonuclease T2 OS=Komagataella phaffii (strain ATCC 76273 / CBS 7435 / CECT 11047 / NRRL Y-11430 / Wegner 21-1) OX=981350 GN=RNY1 PE=3 SV=1
17	14	C4QZY8	164.97	29	29	39200000	0.00804928	10	10	17	Carbamidomethylation	47077	ribonuclease T2 OS=Komagataella phaffii (strain GS115 / ATCC 20864) OX=644223 GN=PAS_chr2-1_0204 PE=3 SV=1
21	14247	F2QUR1	143.43	9	9	38400000	0.00788501	4	4	14	Carbamidomethylation	71659	Endochitinase OS=Komagataella phaffii (strain ATCC 76273 / CBS 7435 / CECT 11047 / NRRL Y-11430 / Wegner 21-1) OX=981350 GN=CTS1 PE=4 SV=1
30	45	C4R4I2	128.35	11	11	23800000	0.00488706	5	5	6	Carbamidomethylation	62370	Metalloprotease with similarity to the zinc carboxypeptidase family OS=Komagataella phaffii (strain GS115 / ATCC 20864) OX=644223 GN=PAS_chr3_0419 PE=3 SV=1
30	44	F2QWG9	128.35	11	11	23800000	0.00488706	5	5	6	Carbamidomethylation	67499	Putative metalloprotease OS=Komagataella phaffii (strain ATCC 76273 / CBS 7435 / CECT 11047 / NRRL Y-11430 / Wegner 21-1) OX=981350 GN=ECM14 PE=3 SV=1
279	5590	C4QYF3	49.55	10	10	13700000	0.00281314	2	2	2		33946	Endo-beta-1 3-glucanase major protein of the cell wall involved in cell wall maintenance OS=Komagataella phaffii (strain GS115 / ATCC 20864) OX=644223 GN=PAS_chr1-4_0426 PE=3 SV=1
279	5589	F2QPL8	49.55	10	10	13700000	0.00281314	2	2	2		33946	Endo-beta-1 3-glucanase OS=Komagataella phaffii (strain ATCC 76273 / CBS 7435 / CECT 11047 / NRRL Y-11430 / Wegner 21-1) OX=981350 GN=BGL2 PE=3 SV=1
41	20372	C4QVL4	129.23	12	12	13600000	0.00279261	4	4	6	Carbamidomethylation	57291	1 3-beta-glucanosyltransferase OS=Komagataella phaffii (strain GS115 / ATCC 20864) OX=644223 GN=PAS_chr1-3_0226 PE=3 SV=1
41	5991	F2QNF8	129.23	12	12	13600000	0.00279261	4	4	6	Carbamidomethylation	57291	1 3-beta-glucanosyltransferase OS=Komagataella phaffii (strain ATCC 76273 / CBS 7435 / CECT 11047 / NRRL Y-11430 / Wegner 21-1) OX=981350 GN=GAS1-1 PE=3 SV=1
19	17	C4QV89	148.17	8	8	9370000	0.00192402	6	6	11	Carbamidomethylation	100304	Heat shock protein that cooperates with Ydj1p (Hsp40) and Ssa1p (Hsp70) OS=Komagataella phaffii (strain GS115 / ATCC 20864) OX=644223 GN=PAS_chr1-3_0102 PE=3 SV=1
19	18	F2QLY3	148.17	8	8	9370000	0.00192402	6	6	11	Carbamidomethylation	100304	Heat shock protein OS=Komagataella phaffii (strain ATCC 76273 / CBS 7435 / CECT 11047 / NRRL Y-11430 / Wegner 21-1) OX=981350 GN=HSP104 PE=3 SV=1
37	15896	F2QSZ6	118.21	10	10	8460000	0.00173717	3	3	7	Carbamidomethylation	44023	Cell wall exo-1 3-beta-glucanase OS=Komagataella phaffii (strain ATCC 76273 / CBS 7435 / CECT 11047 / NRRL Y-11430 / Wegner 21-1) OX=981350 GN=EXG1 PE=3 SV=1
37	15897	C4R0Q7	118.21	9	9	8460000	0.00173717	3	3	7	Carbamidomethylation	47837	Major exo-1 3-beta-glucanase of the cell wall involved in cell wall beta-glucan assembly OS=Komagataella phaffii (strain GS115 / ATCC 20864) OX=644223 GN=PAS_chr2-1_0454 PE=3 SV=1
123	30	C4R862	83.14	9	9	7950000	0.00163244	3	3	3		42440	Aminotransferase class I/classII domain-containing protein OS=Komagataella phaffii (strain GS115 / ATCC 20864) OX=644223 GN=PAS_chr4_0974 PE=3 SV=1
123	29	F2QYY5	83.14	9	9	7950000	0.00163244	3	3	3		45507	Aspartate aminotransferase OS=Komagataella phaffii (strain ATCC 76273 / CBS 7435 / CECT 11047 / NRRL Y-11430 / Wegner 21-1) OX=981350 GN=AAT2 PE=3 SV=2
50	8501	C4R2Z5	124.24	23	23	5800000	0.00119097	4	4	5	Carbamidomethylation	44996	Protein of the SUN family (Sim1p Uth1p Nca3p Sun4p) that may participate in DNA replication OS=Komagataella phaffii (strain GS115 / ATCC 20864) OX=644223 GN=PAS_chr2-2_0064 PE=3 SV=1
50	20371	F2QQT7	124.24	23	23	5800000	0.00119097	4	4	5	Carbamidomethylation	44996	Putative glucanase OS=Komagataella phaffii (strain ATCC 76273 / CBS 7435 / CECT 11047 / NRRL Y-11430 / Wegner 21-1) OX=981350 GN=SUN4 PE=3 SV=1
74	42	F2QR54	89.25	11	11	3600000	0.00073922	2	2	4		27251	Sedoheptulose 1 7-bisphosphatase OS=Komagataella phaffii (strain ATCC 76273 / CBS 7435 / CECT 11047 / NRRL Y-11430 / Wegner 21-1) OX=981350 GN=SHB17 PE=4 SV=1
74	41	C4R2M0	89.25	11	11	3600000	0.00073922	2	2	4		27251	Sedoheptulose 1 7-bisphosphatase OS=Komagataella phaffii (strain GS115 / ATCC 20864) OX=644223 GN=PAS_chr2-2_0177 PE=4 SV=1
59	23	|#CONTAM#K1C15_SHEEP|	75.54	5	5	337000		2	1	2		48770	sp|#CONTAM#K1C15_SHEEP|
77	7038	F2QZA3	66.11	8	8	2310000	0.000474333	2	2	3		44092	alanine--glyoxylate transaminase OS=Komagataella phaffii (strain ATCC 76273 / CBS 7435 / CECT 11047 / NRRL Y-11430 / Wegner 21-1) OX=981350 GN=AGX1 PE=3 SV=1
77	7039	C4R7U0	66.11	8	8	2310000	0.000474333	2	2	3		45429	alanine--glyoxylate transaminase OS=Komagataella phaffii (strain GS115 / ATCC 20864) OX=644223 GN=PAS_chr4_0416 PE=3 SV=1
80	31	F2R0H2	64.45	26	26	2060000	0.000422998	3	3	4		12125	Cytochrome c isoform 1 OS=Komagataella phaffii (strain ATCC 76273 / CBS 7435 / CECT 11047 / NRRL Y-11430 / Wegner 21-1) OX=981350 GN=CYC1 PE=3 SV=1
80	32	C4R6L9	64.45	26	26	2060000	0.000422998	3	3	4		12125	Cytochrome c isoform 1 OS=Komagataella phaffii (strain GS115 / ATCC 20864) OX=644223 GN=PAS_chr4_0018 PE=3 SV=1
149	4562	C4R1A4	38.96	7	7	1780000	0.000365503	2	2	2		36869	Serine/threonine-protein phosphatase OS=Komagataella phaffii (strain GS115 / ATCC 20864) OX=644223 GN=PAS_chr2-1_0635 PE=3 SV=1
149	4563	F2QSF4	38.96	7	7	1780000	0.000365503	2	2	2		36869	Serine/threonine-protein phosphatase OS=Komagataella phaffii (strain ATCC 76273 / CBS 7435 / CECT 11047 / NRRL Y-11430 / Wegner 21-1) OX=981350 GN=GLC7 PE=3 SV=1
261	21801	C4R8H7	58.42	3	3	1390000	0.000285421	2	2	2		63899	Cellulase OS=Komagataella phaffii (strain GS115 / ATCC 20864) OX=644223 GN=PAS_chr4_0643 PE=3 SV=1
261	21802	F2QYL8	58.42	3	3	1390000	0.000285421	2	2	2		63899	Cellulase OS=Komagataella phaffii (strain ATCC 76273 / CBS 7435 / CECT 11047 / NRRL Y-11430 / Wegner 21-1) OX=981350 GN=RCE3 PE=3 SV=1
46	28	F2QR25	75.28	7	7	1370000	0.000281314	2	2	3		37022	Type II HSP40 co-chaperone OS=Komagataella phaffii (strain ATCC 76273 / CBS 7435 / CECT 11047 / NRRL Y-11430 / Wegner 21-1) OX=981350 GN=SIS1 PE=4 SV=1
46	27	C4R2Q1	75.28	7	7	1370000	0.000281314	2	2	3		37022	Type II HSP40 co-chaperone that interacts with the HSP70 protein Ssa1p OS=Komagataella phaffii (strain GS115 / ATCC 20864) OX=644223 GN=PAS_chr2-2_0151 PE=4 SV=1
34	46	F2QX14	89.93	3	3	849000	0.000174333	2	1	7		70767	ATPase involved in protein folding OS=Komagataella phaffii (strain ATCC 76273 / CBS 7435 / CECT 11047 / NRRL Y-11430 / Wegner 21-1) OX=981350 GN=SSA3 PE=3 SV=1
34	47	C4R3X8	89.93	3	3	849000	0.000174333	2	1	7		70767	ATPase involved in protein folding and the response to stress OS=Komagataella phaffii (strain GS115 / ATCC 20864) OX=644223 GN=PAS_chr3_0230 PE=3 SV=1
92	58	|#CONTAM#RS27A_HUMAN|	61.94	6	6	6610000		1	1	4		17965	sp|#CONTAM#RS27A_HUMAN|
301	59	C4R5T8	45.6	5	5	359000	7.37166e-05	2	2	2		38337	fructose-bisphosphatase OS=Komagataella phaffii (strain GS115 / ATCC 20864) OX=644223 GN=PAS_chr3_0868 PE=3 SV=1
301	60	F2QV51	45.6	5	5	359000	7.37166e-05	2	2	2		38337	fructose-bisphosphatase OS=Komagataella phaffii (strain ATCC 76273 / CBS 7435 / CECT 11047 / NRRL Y-11430 / Wegner 21-1) OX=981350 GN=FBP1 PE=3 SV=1
103	4	|#CONTAM#K1C9_HUMAN|	48.4	1	1			1	0	2		62129	sp|#CONTAM#K1C9_HUMAN|
7	50	|#CONTAM#TRFE_HUMAN|	42.86	1	1			1	0	21		77050	sp|#CONTAM#TRFE_HUMAN|
284	1729	|#CONTAM#BGAL_ECOLI|	22.91	0	0			0	0	0		116483	sp|#CONTAM#BGAL_ECOLI|
410	66	|#CONTAM#KRHB4_HUMAN|	21.78	0	0			0	0	0		64895	sp|#CONTAM#KRHB4_HUMAN|

## Sheet: Batch4-MSB66985C
Protein Group	Protein ID	Accession	-10lgP	Coverage (%)	Coverage (%) Sample 5	Intensity Sample 5		#Peptides	#Unique	#Spec Sample 5	PTM	Avg. Mass	Description
1	1	|#CONTAM#TRFL_HUMAN|	384.24	85	85	484000000000	100	48	47	7824	Carbamidomethylation; Oxidation (M)	78182	LACTOFERRIN
2	10	F2QP45	219.98	57	57	402000000	0.0830579	12	11	109	Carbamidomethylation; Oxidation (M)	40434	Fructose-bisphosphate aldolase OS=Komagataella phaffii (strain ATCC 76273 / CBS 7435 / CECT 11047 / NRRL Y-11430 / Wegner 21-1) OX=981350 GN=FBA1-2 PE=3 SV=1
7	264024	MannosidaseTR	221.96	30	30	367000000	0.0758264	12	12	47	Carbamidomethylation; Oxidation (M)	64030	MannosidaseTR
5	12	C4QZS3	224.94	24	24	315000000	0.0650826	15	14	57	Oxidation (M)	74214	Endoplasmic reticulum chaperone BiP OS=Komagataella phaffii (strain GS115 / ATCC 20864) OX=644223 GN=PAS_chr2-1_0140 PE=3 SV=1
12	2	|#CONTAM#K2C1_HUMAN|	222.53	36	36	87600000		17	15	31	Carbamidomethylation	65886	sp|#CONTAM#K2C1_HUMAN|
3	5	C4QY07	253.77	62	62	270000000	0.0557851	17	17	67		44103	Phosphoglycerate kinase OS=Komagataella phaffii (strain GS115 / ATCC 20864) OX=644223 GN=PAS_chr1-4_0292 PE=3 SV=1
3	6	F2QLH3	253.77	62	62	270000000	0.0557851	17	17	67		44103	Phosphoglycerate kinase OS=Komagataella phaffii (strain ATCC 76273 / CBS 7435 / CECT 11047 / NRRL Y-11430 / Wegner 21-1) OX=981350 GN=PGK1 PE=3 SV=1
24	36	F2QXH5	113.66	12	12	198000000	0.0409091	3	3	5	Carbamidomethylation	31886	Extracellular protein X1 OS=Komagataella phaffii (strain ATCC 76273 / CBS 7435 / CECT 11047 / NRRL Y-11430 / Wegner 21-1) OX=981350 GN=EPX1 PE=4 SV=1
24	35	C4R3H3	113.66	12	12	198000000	0.0409091	3	3	5	Carbamidomethylation	31886	SCP domain-containing protein OS=Komagataella phaffii (strain GS115 / ATCC 20864) OX=644223 GN=PAS_chr3_0076 PE=4 SV=1
11	15	C4R2S1	214.23	45	45	136000000	0.0280992	16	16	26	Carbamidomethylation	57865	Catalase OS=Komagataella phaffii (strain GS115 / ATCC 20864) OX=644223 GN=PAS_chr2-2_0131 PE=3 SV=1
11	16	F2QR06	214.23	45	45	136000000	0.0280992	16	16	26	Carbamidomethylation	57865	Catalase OS=Komagataella phaffii (strain ATCC 76273 / CBS 7435 / CECT 11047 / NRRL Y-11430 / Wegner 21-1) OX=981350 GN=CTA1 PE=3 SV=1
14	19	C4R8X7	190.19	66	66	124000000	0.0256198	8	8	24	Carbamidomethylation	15677	Superoxide dismutase [Cu-Zn] OS=Komagataella phaffii (strain GS115 / ATCC 20864) OX=644223 GN=PAS_chr4_0786 PE=3 SV=1
14	20	F2QY66	190.19	66	66	124000000	0.0256198	8	8	24	Carbamidomethylation	15677	Superoxide dismutase [Cu-Zn] OS=Komagataella phaffii (strain ATCC 76273 / CBS 7435 / CECT 11047 / NRRL Y-11430 / Wegner 21-1) OX=981350 GN=SOD1 PE=3 SV=1
6	24	|#CONTAM#TRYP_PIG|	175.31	29	29	2850000000		5	5	52	Oxidation (M)	24409	sp|#CONTAM#TRYP_PIG|
9	8	C4QZU2	215.24	32	32	64200000	0.0132645	19	18	40	Carbamidomethylation; Oxidation (M)	85839	5-methyltetrahydropteroyltriglutamate--homocysteine S-methyltransferase OS=Komagataella phaffii (strain GS115 / ATCC 20864) OX=644223 GN=PAS_chr2-1_0160 PE=3 SV=1
9	9	F2QTU9	215.24	32	32	64200000	0.0132645	19	18	40	Carbamidomethylation; Oxidation (M)	85839	5-methyltetrahydropteroyltriglutamate--homocysteine S-methyltransferase OS=Komagataella phaffii (strain ATCC 76273 / CBS 7435 / CECT 11047 / NRRL Y-11430 / Wegner 21-1) OX=981350 GN=MET6 PE=3 SV=1
15	7	|#CONTAM#K22E_HUMAN|	155.77	12	12	16000000		6	5	11		65865	sp|#CONTAM#K22E_HUMAN|
16	3	|#CONTAM#K1C10_HUMAN|	155.17	23	23	54500000		9	8	19	Carbamidomethylation	59519	sp|#CONTAM#K1C10_HUMAN|
13	13	A0A1G4KQ19	163.38	37	37	44800000	0.0092562	10	10	23	Carbamidomethylation	45824	ribonuclease T2 OS=Komagataella phaffii (strain ATCC 76273 / CBS 7435 / CECT 11047 / NRRL Y-11430 / Wegner 21-1) OX=981350 GN=RNY1 PE=3 SV=1
13	14	C4QZY8	163.38	36	36	44800000	0.0092562	10	10	23	Carbamidomethylation	47077	ribonuclease T2 OS=Komagataella phaffii (strain GS115 / ATCC 20864) OX=644223 GN=PAS_chr2-1_0204 PE=3 SV=1
39	25	F2QSQ9	136.02	32	32	43100000	0.00890496	4	4	7	Carbamidomethylation	23657	Uncharacterized protein OS=Komagataella phaffii (strain ATCC 76273 / CBS 7435 / CECT 11047 / NRRL Y-11430 / Wegner 21-1) OX=981350 GN=PP7435_Chr2-0752 PE=4 SV=1
39	26	C4R0Z8	136.02	32	32	43100000	0.00890496	4	4	7	Carbamidomethylation	23657	Uncharacterized protein OS=Komagataella phaffii (strain GS115 / ATCC 20864) OX=644223 GN=PAS_chr2-1_0539 PE=4 SV=1
21	45	C4R4I2	141.5	13	13	28500000	0.00588843	5	5	7	Carbamidomethylation	62370	Metalloprotease with similarity to the zinc carboxypeptidase family OS=Komagataella phaffii (strain GS115 / ATCC 20864) OX=644223 GN=PAS_chr3_0419 PE=3 SV=1
32	4	|#CONTAM#K1C9_HUMAN|	122.34	12	12	7580000		4	4	4		62129	sp|#CONTAM#K1C9_HUMAN|
21	44	F2QWG9	141.5	12	12	28500000	0.00588843	5	5	7	Carbamidomethylation	67499	Putative metalloprotease OS=Komagataella phaffii (strain ATCC 76273 / CBS 7435 / CECT 11047 / NRRL Y-11430 / Wegner 21-1) OX=981350 GN=ECM14 PE=3 SV=1
17	14247	F2QUR1	135.48	9	9	27500000	0.00568182	4	4	17	Carbamidomethylation	71659	Endochitinase OS=Komagataella phaffii (strain ATCC 76273 / CBS 7435 / CECT 11047 / NRRL Y-11430 / Wegner 21-1) OX=981350 GN=CTS1 PE=4 SV=1
52	5590	C4QYF3	64.54	10	10	20200000	0.00417355	2	2	4		33946	Endo-beta-1 3-glucanase major protein of the cell wall involved in cell wall maintenance OS=Komagataella phaffii (strain GS115 / ATCC 20864) OX=644223 GN=PAS_chr1-4_0426 PE=3 SV=1
52	5589	F2QPL8	64.54	10	10	20200000	0.00417355	2	2	4		33946	Endo-beta-1 3-glucanase OS=Komagataella phaffii (strain ATCC 76273 / CBS 7435 / CECT 11047 / NRRL Y-11430 / Wegner 21-1) OX=981350 GN=BGL2 PE=3 SV=1
45	8501	C4R2Z5	116.44	11	11	10800000	0.0022314	3	3	6	Carbamidomethylation	44996	Protein of the SUN family (Sim1p Uth1p Nca3p Sun4p) that may participate in DNA replication OS=Komagataella phaffii (strain GS115 / ATCC 20864) OX=644223 GN=PAS_chr2-2_0064 PE=3 SV=1
45	20371	F2QQT7	116.44	11	11	10800000	0.0022314	3	3	6	Carbamidomethylation	44996	Putative glucanase OS=Komagataella phaffii (strain ATCC 76273 / CBS 7435 / CECT 11047 / NRRL Y-11430 / Wegner 21-1) OX=981350 GN=SUN4 PE=3 SV=1
23	20372	C4QVL4	101.71	8	8	9770000	0.0020186	3	3	5	Carbamidomethylation	57291	1 3-beta-glucanosyltransferase OS=Komagataella phaffii (strain GS115 / ATCC 20864) OX=644223 GN=PAS_chr1-3_0226 PE=3 SV=1
23	5991	F2QNF8	101.71	8	8	9770000	0.0020186	3	3	5	Carbamidomethylation	57291	1 3-beta-glucanosyltransferase OS=Komagataella phaffii (strain ATCC 76273 / CBS 7435 / CECT 11047 / NRRL Y-11430 / Wegner 21-1) OX=981350 GN=GAS1-1 PE=3 SV=1
57	15896	F2QSZ6	121.97	10	10	9280000	0.00191736	3	3	5	Carbamidomethylation	44023	Cell wall exo-1 3-beta-glucanase OS=Komagataella phaffii (strain ATCC 76273 / CBS 7435 / CECT 11047 / NRRL Y-11430 / Wegner 21-1) OX=981350 GN=EXG1 PE=3 SV=1
57	15897	C4R0Q7	121.97	9	9	9280000	0.00191736	3	3	5	Carbamidomethylation	47837	Major exo-1 3-beta-glucanase of the cell wall involved in cell wall beta-glucan assembly OS=Komagataella phaffii (strain GS115 / ATCC 20864) OX=644223 GN=PAS_chr2-1_0454 PE=3 SV=1
60	21	C4R2L8	63.04	7	7	8420000	0.00173967	2	2	2	Carbamidomethylation	50881	L-type lectin-like domain-containing protein OS=Komagataella phaffii (strain GS115 / ATCC 20864) OX=644223 GN=PAS_chr2-2_0178 PE=4 SV=1
60	22	F2QR56	63.04	7	7	8420000	0.00173967	2	2	2	Carbamidomethylation	50881	L-type lectin-like domain-containing protein OS=Komagataella phaffii (strain ATCC 76273 / CBS 7435 / CECT 11047 / NRRL Y-11430 / Wegner 21-1) OX=981350 GN=PP7435_Chr2-0187 PE=4 SV=1
70	23	|#CONTAM#K1C15_SHEEP|	73.19	5	5	615000		2	1	3		48770	sp|#CONTAM#K1C15_SHEEP|
38	29	F2QYY5	107	12	12	7930000	0.00163843	4	4	7		45507	Aspartate aminotransferase OS=Komagataella phaffii (strain ATCC 76273 / CBS 7435 / CECT 11047 / NRRL Y-11430 / Wegner 21-1) OX=981350 GN=AAT2 PE=3 SV=2
38	30	C4R862	107	13	13	7930000	0.00163843	4	4	7		42440	Aminotransferase class I/classII domain-containing protein OS=Komagataella phaffii (strain GS115 / ATCC 20864) OX=644223 GN=PAS_chr4_0974 PE=3 SV=1
28	17	C4QV89	116.93	7	7	4890000	0.00101033	5	5	8	Carbamidomethylation	100304	Heat shock protein that cooperates with Ydj1p (Hsp40) and Ssa1p (Hsp70) OS=Komagataella phaffii (strain GS115 / ATCC 20864) OX=644223 GN=PAS_chr1-3_0102 PE=3 SV=1
28	18	F2QLY3	116.93	7	7	4890000	0.00101033	5	5	8	Carbamidomethylation	100304	Heat shock protein OS=Komagataella phaffii (strain ATCC 76273 / CBS 7435 / CECT 11047 / NRRL Y-11430 / Wegner 21-1) OX=981350 GN=HSP104 PE=3 SV=1
130	59	C4R5T8	58.05	5	5	3080000	0.000636364	2	2	2		38337	fructose-bisphosphatase OS=Komagataella phaffii (strain GS115 / ATCC 20864) OX=644223 GN=PAS_chr3_0868 PE=3 SV=1
130	60	F2QV51	58.05	5	5	3080000	0.000636364	2	2	2		38337	fructose-bisphosphatase OS=Komagataella phaffii (strain ATCC 76273 / CBS 7435 / CECT 11047 / NRRL Y-11430 / Wegner 21-1) OX=981350 GN=FBP1 PE=3 SV=1
58	33	C4R135	53.98	8	8	2600000	0.00053719	2	2	5		32127	Xylose and arabinose reductase OS=Komagataella phaffii (strain GS115 / ATCC 20864) OX=644223 GN=PAS_chr2-1_0573 PE=4 SV=1
58	34	F2QSM2	53.98	8	8	2600000	0.00053719	2	2	5		32127	Xylose and arabinose reductase OS=Komagataella phaffii (strain ATCC 76273 / CBS 7435 / CECT 11047 / NRRL Y-11430 / Wegner 21-1) OX=981350 GN=PP7435_Chr2-0714 PE=4 SV=1
114	303	C4R312	46.95	5	5	1890000	0.000390496	2	2	3	Oxidation (M)	52357	Dihydrolipoyl dehydrogenase OS=Komagataella phaffii (strain GS115 / ATCC 20864) OX=644223 GN=PAS_chr2-2_0048 PE=3 SV=1
114	304	F2QQR8	46.95	5	5	1890000	0.000390496	2	2	3	Oxidation (M)	52357	Dihydrolipoyl dehydrogenase OS=Komagataella phaffii (strain ATCC 76273 / CBS 7435 / CECT 11047 / NRRL Y-11430 / Wegner 21-1) OX=981350 GN=LPD1 PE=3 SV=1
207	7038	F2QZA3	68.5	8	8	723000	0.00014938	2	2	2		44092	alanine--glyoxylate transaminase OS=Komagataella phaffii (strain ATCC 76273 / CBS 7435 / CECT 11047 / NRRL Y-11430 / Wegner 21-1) OX=981350 GN=AGX1 PE=3 SV=1
207	7039	C4R7U0	68.5	8	8	723000	0.00014938	2	2	2		45429	alanine--glyoxylate transaminase OS=Komagataella phaffii (strain GS115 / ATCC 20864) OX=644223 GN=PAS_chr4_0416 PE=3 SV=1
89	58	|#CONTAM#RS27A_HUMAN|	53.93	6	6	6.54E6		1	1	4		17965	sp|#CONTAM#RS27A_HUMAN|
4	50	|#CONTAM#TRFE_HUMAN|	50.03	1	1			1	0	16		77050	sp|#CONTAM#TRFE_HUMAN|
155	66	|#CONTAM#KRHB4_HUMAN|	32.52	0	0			0	0	0		64895	sp|#CONTAM#KRHB4_HUMAN|

## Sheet: Batch5-MSB66986A
Protein Group	Protein ID	Accession	-10lgP	Coverage (%)	Coverage (%) Sample 6	Intensity Sample 6		#Peptides	#Unique	#Spec Sample 6	PTM	Avg. Mass	Description
1	1	|#CONTAM#TRFL_HUMAN|	407.4	86	86	487000000000	100	49	48	6754	Carbamidomethylation; Oxidation (M)	78182	LACTOFERRIN
2	2	|#CONTAM#K2C1_HUMAN|	291.97	49	49	568000000		22	21	68	Carbamidomethylation; Oxidation (M)	65886	sp|#CONTAM#K2C1_HUMAN|
4	3	|#CONTAM#K1C10_HUMAN|	246.27	42	42	280000000		20	16	47	Carbamidomethylation; Oxidation (M)	59519	sp|#CONTAM#K1C10_HUMAN|
7	7	|#CONTAM#K22E_HUMAN|	220.56	31	31	85500000		16	15	31	Carbamidomethylation	65865	sp|#CONTAM#K22E_HUMAN|
6	10	F2QP45	215.26	40	40	161000000	0.0330595	8	8	27	Carbamidomethylation; Oxidation (M)	40434	Fructose-bisphosphate aldolase OS=Komagataella phaffii (strain ATCC 76273 / CBS 7435 / CECT 11047 / NRRL Y-11430 / Wegner 21-1) OX=981350 GN=FBA1-2 PE=3 SV=1
8	12	C4QZS3	215.44	20	20	152000000	0.0312115	11	10	32		74214	Endoplasmic reticulum chaperone BiP OS=Komagataella phaffii (strain GS115 / ATCC 20864) OX=644223 GN=PAS_chr2-1_0140 PE=3 SV=1
9	4	|#CONTAM#K1C9_HUMAN|	213.55	35	35	61000000		14	13	20		62129	sp|#CONTAM#K1C9_HUMAN|
23	35	C4R3H3	94.75	6	6	57400000	0.0117864	2	2	8	Carbamidomethylation	31886	SCP domain-containing protein OS=Komagataella phaffii (strain GS115 / ATCC 20864) OX=644223 GN=PAS_chr3_0076 PE=4 SV=1
23	36	F2QXH5	94.75	6	6	57400000	0.0117864	2	2	8	Carbamidomethylation	31886	Extracellular protein X1 OS=Komagataella phaffii (strain ATCC 76273 / CBS 7435 / CECT 11047 / NRRL Y-11430 / Wegner 21-1) OX=981350 GN=EPX1 PE=4 SV=1
10	5	C4QY07	198.77	44	44	49200000	0.0101027	11	11	22		44103	Phosphoglycerate kinase OS=Komagataella phaffii (strain GS115 / ATCC 20864) OX=644223 GN=PAS_chr1-4_0292 PE=3 SV=1
10	6	F2QLH3	198.77	44	44	49200000	0.0101027	11	11	22		44103	Phosphoglycerate kinase OS=Komagataella phaffii (strain ATCC 76273 / CBS 7435 / CECT 11047 / NRRL Y-11430 / Wegner 21-1) OX=981350 GN=PGK1 PE=3 SV=1
5	24	|#CONTAM#TRYP_PIG|	172.82	25	25	4260000000		4	4	40	Oxidation (M)	24409	sp|#CONTAM#TRYP_PIG|
15	15	C4R2S1	176.02	26	26	43900000	0.00901437	10	10	13		57865	Catalase OS=Komagataella phaffii (strain GS115 / ATCC 20864) OX=644223 GN=PAS_chr2-2_0131 PE=3 SV=1
15	16	F2QR06	176.02	26	26	43900000	0.00901437	10	10	13		57865	Catalase OS=Komagataella phaffii (strain ATCC 76273 / CBS 7435 / CECT 11047 / NRRL Y-11430 / Wegner 21-1) OX=981350 GN=CTA1 PE=3 SV=1
13	13	A0A1G4KQ19	162.36	23	23	28600000	0.00587269	7	7	14	Carbamidomethylation	45824	ribonuclease T2 OS=Komagataella phaffii (strain ATCC 76273 / CBS 7435 / CECT 11047 / NRRL Y-11430 / Wegner 21-1) OX=981350 GN=RNY1 PE=3 SV=1
13	14	C4QZY8	162.36	22	22	28600000	0.00587269	7	7	14	Carbamidomethylation	47077	ribonuclease T2 OS=Komagataella phaffii (strain GS115 / ATCC 20864) OX=644223 GN=PAS_chr2-1_0204 PE=3 SV=1
16	23	|#CONTAM#K1C15_SHEEP|	116.03	9	9	2770000		4	1	9		48770	sp|#CONTAM#K1C15_SHEEP|
44	264024	MannosidaseTR	128.72	12	12	11600000	0.00238193	5	5	6	Carbamidomethylation	64030	MannosidaseTR
38	44	F2QWG9	117.01	8	8	10800000	0.00221766	4	4	4	Carbamidomethylation	67499	Putative metalloprotease OS=Komagataella phaffii (strain ATCC 76273 / CBS 7435 / CECT 11047 / NRRL Y-11430 / Wegner 21-1) OX=981350 GN=ECM14 PE=3 SV=1
36	19	C4R8X7	93.32	27	27	7750000	0.00159138	4	4	8		15677	Superoxide dismutase [Cu-Zn] OS=Komagataella phaffii (strain GS115 / ATCC 20864) OX=644223 GN=PAS_chr4_0786 PE=3 SV=1
36	20	F2QY66	93.32	27	27	7750000	0.00159138	4	4	8		15677	Superoxide dismutase [Cu-Zn] OS=Komagataella phaffii (strain ATCC 76273 / CBS 7435 / CECT 11047 / NRRL Y-11430 / Wegner 21-1) OX=981350 GN=SOD1 PE=3 SV=1
43	17	C4QV89	83.57	4	4	1890000	0.00038809	3	3	4	Carbamidomethylation	100304	Heat shock protein that cooperates with Ydj1p (Hsp40) and Ssa1p (Hsp70) OS=Komagataella phaffii (strain GS115 / ATCC 20864) OX=644223 GN=PAS_chr1-3_0102 PE=3 SV=1
43	18	F2QLY3	83.57	4	4	1890000	0.00038809	3	3	4	Carbamidomethylation	100304	Heat shock protein OS=Komagataella phaffii (strain ATCC 76273 / CBS 7435 / CECT 11047 / NRRL Y-11430 / Wegner 21-1) OX=981350 GN=HSP104 PE=3 SV=1
18	9701	C4QXF3	42.47	3	3	0	0	2	2	3	Oxidation (M)	86222	Plasma membrane Mg(2+) transporter expression and turnover are regulated by Mg(2+) concentration OS=Komagataella phaffii (strain GS115 / ATCC 20864) OX=644223 GN=PAS_chr1-4_0096 PE=3 SV=1
18	9702	F2QN50	42.47	3	3	0	0	2	2	3	Oxidation (M)	86222	Plasma membrane Mg(2+) transporter OS=Komagataella phaffii (strain ATCC 76273 / CBS 7435 / CECT 11047 / NRRL Y-11430 / Wegner 21-1) OX=981350 GN=ALR1 PE=3 SV=1
3	50	|#CONTAM#TRFE_HUMAN|	56.04	2	2	0		2	1	7		77050	sp|#CONTAM#TRFE_HUMAN|
88	58	|#CONTAM#RS27A_HUMAN|	46	6	6	2940000		1	1	3		17965	sp|#CONTAM#RS27A_HUMAN|
250	5623	|#CONTAM#ALBU_BOVIN|	25.9	0	0			0	0	0		69294	sp|#CONTAM#ALBU_BOVIN|
576	1664	|#CONTAM#KRHB5_HUMAN|	22.72	0	0			0	0	0		55802	sp|#CONTAM#KRHB5_HUMAN|
1380	44378	|#CONTAM#TNFA_HUMAN|	21.55	0	0			0	0	0		25644	sp|#CONTAM#TNFA_HUMAN|
167	4198	|#CONTAM#GFP_AEQVI|	20.07	0	0			0	0	0		26886	sp|#CONTAM#GFP_AEQVI|

## Sheet: Batch5-MSB66986B
Protein Group	Protein ID	Accession	-10lgP	Coverage (%)	Coverage (%) Sample 7	Intensity Sample 7		#Peptides	#Unique	#Spec Sample 7	PTM	Avg. Mass	Description
1	1	|#CONTAM#TRFL_HUMAN|	392.65	85	85	439000000000	100	48	47	6953	Carbamidomethylation; Oxidation (M)	78182	LACTOFERRIN
2	2	|#CONTAM#K2C1_HUMAN|	287.34	49	49	505000000		22	21	80	Carbamidomethylation; Oxidation (M)	65886	sp|#CONTAM#K2C1_HUMAN|
5	3	|#CONTAM#K1C10_HUMAN|	241.14	43	43	235000000		21	16	47	Carbamidomethylation; Oxidation (M)	59519	sp|#CONTAM#K1C10_HUMAN|
8	12	C4QZS3	203.62	22	22	168000000	0.0382688	13	13	33		74214	Endoplasmic reticulum chaperone BiP OS=Komagataella phaffii (strain GS115 / ATCC 20864) OX=644223 GN=PAS_chr2-1_0140 PE=3 SV=1
7	7	|#CONTAM#K22E_HUMAN|	204.74	26	26	68200000		14	12	29	Carbamidomethylation	65865	sp|#CONTAM#K22E_HUMAN|
9	5	C4QY07	191.39	44	44	46300000	0.0105467	11	11	25		44103	Phosphoglycerate kinase OS=Komagataella phaffii (strain GS115 / ATCC 20864) OX=644223 GN=PAS_chr1-4_0292 PE=3 SV=1
11	4	|#CONTAM#K1C9_HUMAN|	199.92	27	27	49500000		12	11	20		62129	sp|#CONTAM#K1C9_HUMAN|
9	6	F2QLH3	191.39	44	44	46300000	0.0105467	11	11	25		44103	Phosphoglycerate kinase OS=Komagataella phaffii (strain ATCC 76273 / CBS 7435 / CECT 11047 / NRRL Y-11430 / Wegner 21-1) OX=981350 GN=PGK1 PE=3 SV=1
10	10	F2QP45	210.54	40	40	137000000	0.0312073	8	8	25	Carbamidomethylation	40434	Fructose-bisphosphate aldolase OS=Komagataella phaffii (strain ATCC 76273 / CBS 7435 / CECT 11047 / NRRL Y-11430 / Wegner 21-1) OX=981350 GN=FBA1-2 PE=3 SV=1
3	24	|#CONTAM#TRYP_PIG|	175.21	29	29	1510000000		5	5	53	Oxidation (M)	24409	sp|#CONTAM#TRYP_PIG|
14	15	C4R2S1	158.95	21	21	40700000	0.00927107	8	8	15		57865	Catalase OS=Komagataella phaffii (strain GS115 / ATCC 20864) OX=644223 GN=PAS_chr2-2_0131 PE=3 SV=1
14	16	F2QR06	158.95	21	21	40700000	0.00927107	8	8	15		57865	Catalase OS=Komagataella phaffii (strain ATCC 76273 / CBS 7435 / CECT 11047 / NRRL Y-11430 / Wegner 21-1) OX=981350 GN=CTA1 PE=3 SV=1
23	13	A0A1G4KQ19	137.39	17	17	9110000	0.00207517	5	5	8	Carbamidomethylation	45824	ribonuclease T2 OS=Komagataella phaffii (strain ATCC 76273 / CBS 7435 / CECT 11047 / NRRL Y-11430 / Wegner 21-1) OX=981350 GN=RNY1 PE=3 SV=1
23	14	C4QZY8	137.39	16	16	9110000	0.00207517	5	5	8	Carbamidomethylation	47077	ribonuclease T2 OS=Komagataella phaffii (strain GS115 / ATCC 20864) OX=644223 GN=PAS_chr2-1_0204 PE=3 SV=1
33	264024	MannosidaseTR	131.26	11	11	19000000	0.00432802	5	5	6		64030	MannosidaseTR
19	23	|#CONTAM#K1C15_SHEEP|	117.97	10	10	3020000		5	1	8		48770	sp|#CONTAM#K1C15_SHEEP|
26	45	C4R4I2	110.76	12	12	13200000	0.00300683	5	5	7	Carbamidomethylation	62370	Metalloprotease with similarity to the zinc carboxypeptidase family OS=Komagataella phaffii (strain GS115 / ATCC 20864) OX=644223 GN=PAS_chr3_0419 PE=3 SV=1
26	44	F2QWG9	110.76	11	11	13200000	0.00300683	5	5	7	Carbamidomethylation	67499	Putative metalloprotease OS=Komagataella phaffii (strain ATCC 76273 / CBS 7435 / CECT 11047 / NRRL Y-11430 / Wegner 21-1) OX=981350 GN=ECM14 PE=3 SV=1
34	19	C4R8X7	98.48	19	19	3510000	0.000799544	3	3	4		15677	Superoxide dismutase [Cu-Zn] OS=Komagataella phaffii (strain GS115 / ATCC 20864) OX=644223 GN=PAS_chr4_0786 PE=3 SV=1
34	20	F2QY66	98.48	19	19	3510000	0.000799544	3	3	4		15677	Superoxide dismutase [Cu-Zn] OS=Komagataella phaffii (strain ATCC 76273 / CBS 7435 / CECT 11047 / NRRL Y-11430 / Wegner 21-1) OX=981350 GN=SOD1 PE=3 SV=1
63	21	C4R2L8	85.02	10	10	6340000	0.00144419	3	3	4	Carbamidomethylation	50881	L-type lectin-like domain-containing protein OS=Komagataella phaffii (strain GS115 / ATCC 20864) OX=644223 GN=PAS_chr2-2_0178 PE=4 SV=1
63	22	F2QR56	85.02	10	10	6340000	0.00144419	3	3	4	Carbamidomethylation	50881	L-type lectin-like domain-containing protein OS=Komagataella phaffii (strain ATCC 76273 / CBS 7435 / CECT 11047 / NRRL Y-11430 / Wegner 21-1) OX=981350 GN=PP7435_Chr2-0187 PE=4 SV=1
184	60082	A0A1G4KR04	76.83	23	23	0	0	2	2	2	Carbamidomethylation	11479	IMS import disulfide relay-system CHCH-CHCH-like Cx9C domain-containing protein OS=Komagataella phaffii (strain ATCC 76273 / CBS 7435 / CECT 11047 / NRRL Y-11430 / Wegner 21-1) OX=981350 GN=PP7435_Chr4-2082 PE=4 SV=1
58	17	C4QV89	65.57	2	2	1290000	0.00029385	2	2	2		100304	Heat shock protein that cooperates with Ydj1p (Hsp40) and Ssa1p (Hsp70) OS=Komagataella phaffii (strain GS115 / ATCC 20864) OX=644223 GN=PAS_chr1-3_0102 PE=3 SV=1
58	18	F2QLY3	65.57	2	2	1290000	0.00029385	2	2	2		100304	Heat shock protein OS=Komagataella phaffii (strain ATCC 76273 / CBS 7435 / CECT 11047 / NRRL Y-11430 / Wegner 21-1) OX=981350 GN=HSP104 PE=3 SV=1
273	37	C4QW48	55.86	13	13	4750000	0.001082	2	2	2	Carbamidomethylation	33398	Superoxide dismutase copper/zinc binding domain-containing protein OS=Komagataella phaffii (strain GS115 / ATCC 20864) OX=644223 GN=PAS_chr1-1_0109 PE=4 SV=1
273	38	F2QMC1	55.86	13	13	4750000	0.001082	2	2	2	Carbamidomethylation	33398	Putative Cu/Zn superoxide dismutase OS=Komagataella phaffii (strain ATCC 76273 / CBS 7435 / CECT 11047 / NRRL Y-11430 / Wegner 21-1) OX=981350 GN=SOD200 PE=4 SV=1
97	29	F2QYY5	53.48	6	6	2250000	0.000512528	2	2	3		45507	Aspartate aminotransferase OS=Komagataella phaffii (strain ATCC 76273 / CBS 7435 / CECT 11047 / NRRL Y-11430 / Wegner 21-1) OX=981350 GN=AAT2 PE=3 SV=2
97	30	C4R862	53.48	7	7	2250000	0.000512528	2	2	3		42440	Aminotransferase class I/classII domain-containing protein OS=Komagataella phaffii (strain GS115 / ATCC 20864) OX=644223 GN=PAS_chr4_0974 PE=3 SV=1
30	66	|#CONTAM#KRHB4_HUMAN|	59.93	1	1			1	0	1		64895	sp|#CONTAM#KRHB4_HUMAN|
169	67	|#CONTAM#K1H2_HUMAN|	51.66	2	2			1	0	1		50319	sp|#CONTAM#K1H2_HUMAN|
216	61	|#CONTAM#K1H5_HUMAN|	51.35	2	2			1	0	1		47597	sp|#CONTAM#K1H5_HUMAN|
67	58	|#CONTAM#RS27A_HUMAN|	43.58	6	6	2450000		1	1	4		17965	sp|#CONTAM#RS27A_HUMAN|
4	50	|#CONTAM#TRFE_HUMAN|	34.25	1	1			1	0	19		77050	sp|#CONTAM#TRFE_HUMAN|
260	1729	|#CONTAM#BGAL_ECOLI|	30.93	0	0			0	0	0		116483	sp|#CONTAM#BGAL_ECOLI|
140	234	|#CONTAM#KRHB3_HUMAN|	27.12	0	0			0	0	0		54214	sp|#CONTAM#KRHB3_HUMAN|

## Sheet: Batch5-MSB66986C
Protein Group	Protein ID	Accession	-10lgP	Coverage (%)	Coverage (%) Sample 8	Intensity Sample 8		#Peptides	#Unique	#Spec Sample 8	PTM	Avg. Mass	Description
1	1	|#CONTAM#TRFL_HUMAN|	385.58	85	85	4.7E11	100	48	47	7375	Carbamidomethylation; Oxidation (M)	78182	LACTOFERRIN
2	2	|#CONTAM#K2C1_HUMAN|	254.88	40	40	5.11E8		20	18	69	Carbamidomethylation; Oxidation (M)	65886	sp|#CONTAM#K2C1_HUMAN|
4	3	|#CONTAM#K1C10_HUMAN|	248.46	48	48	2.8E8		22	17	48	Carbamidomethylation	59519	sp|#CONTAM#K1C10_HUMAN|
6	7	|#CONTAM#K22E_HUMAN|	219.22	33	33	8.96E7		16	13	36	Carbamidomethylation	65865	sp|#CONTAM#K22E_HUMAN|
7	12	C4QZS3	202.33	20	20	1.56E8	0.0331915	12	11	36		74214	Endoplasmic reticulum chaperone BiP OS=Komagataella phaffii (strain GS115 / ATCC 20864) OX=644223 GN=PAS_chr2-1_0140 PE=3 SV=1
9	4	|#CONTAM#K1C9_HUMAN|	209.77	40	40	6.25E7		14	13	27		62129	sp|#CONTAM#K1C9_HUMAN|
10	5	C4QY07	192.17	44	44	4.53E7	0.0096383	11	11	23		44103	Phosphoglycerate kinase OS=Komagataella phaffii (strain GS115 / ATCC 20864) OX=644223 GN=PAS_chr1-4_0292 PE=3 SV=1
10	6	F2QLH3	192.17	44	44	4.53E7	0.0096383	11	11	23		44103	Phosphoglycerate kinase OS=Komagataella phaffii (strain ATCC 76273 / CBS 7435 / CECT 11047 / NRRL Y-11430 / Wegner 21-1) OX=981350 GN=PGK1 PE=3 SV=1
8	10	F2QP45	212.36	35	35	1.57E8	0.0334043	8	8	23	Carbamidomethylation; Oxidation (M)	40434	Fructose-bisphosphate aldolase OS=Komagataella phaffii (strain ATCC 76273 / CBS 7435 / CECT 11047 / NRRL Y-11430 / Wegner 21-1) OX=981350 GN=FBA1-2 PE=3 SV=1
3	24	|#CONTAM#TRYP_PIG|	185.02	35	35	1.83E9		6	6	53	Carbamidomethylation; Oxidation (M)	24409	sp|#CONTAM#TRYP_PIG|
14	15	C4R2S1	151.9	15	15	3.29E7	0.007	6	6	11		57865	Catalase OS=Komagataella phaffii (strain GS115 / ATCC 20864) OX=644223 GN=PAS_chr2-2_0131 PE=3 SV=1
14	16	F2QR06	151.9	15	15	3.29E7	0.007	6	6	11		57865	Catalase OS=Komagataella phaffii (strain ATCC 76273 / CBS 7435 / CECT 11047 / NRRL Y-11430 / Wegner 21-1) OX=981350 GN=CTA1 PE=3 SV=1
15	13	A0A1G4KQ19	135.77	15	15	7.92E6	0.00168511	5	5	10	Carbamidomethylation	45824	ribonuclease T2 OS=Komagataella phaffii (strain ATCC 76273 / CBS 7435 / CECT 11047 / NRRL Y-11430 / Wegner 21-1) OX=981350 GN=RNY1 PE=3 SV=1
15	14	C4QZY8	135.77	15	15	7.92E6	0.00168511	5	5	10	Carbamidomethylation	47077	ribonuclease T2 OS=Komagataella phaffii (strain GS115 / ATCC 20864) OX=644223 GN=PAS_chr2-1_0204 PE=3 SV=1
31	264024	MannosidaseTR	122.27	13	13	1.49E7	0.00317021	5	5	7	Carbamidomethylation	64030	MannosidaseTR
20	23	|#CONTAM#K1C15_SHEEP|	122	10	10	3.17E6		5	1	9		48770	sp|#CONTAM#K1C15_SHEEP|
39	19	C4R8X7	98.81	27	27	5.01E6	0.00106596	4	4	6		15677	Superoxide dismutase [Cu-Zn] OS=Komagataella phaffii (strain GS115 / ATCC 20864) OX=644223 GN=PAS_chr4_0786 PE=3 SV=1
39	20	F2QY66	98.81	27	27	5.01E6	0.00106596	4	4	6		15677	Superoxide dismutase [Cu-Zn] OS=Komagataella phaffii (strain ATCC 76273 / CBS 7435 / CECT 11047 / NRRL Y-11430 / Wegner 21-1) OX=981350 GN=SOD1 PE=3 SV=1
43	44	F2QWG9	98.18	7	7	7.44E6	0.00158298	3	3	5	Carbamidomethylation	67499	Putative metalloprotease OS=Komagataella phaffii (strain ATCC 76273 / CBS 7435 / CECT 11047 / NRRL Y-11430 / Wegner 21-1) OX=981350 GN=ECM14 PE=3 SV=1
43	45	C4R4I2	98.18	8	8	7.44E6	0.00158298	3	3	5	Carbamidomethylation	62370	Metalloprotease with similarity to the zinc carboxypeptidase family OS=Komagataella phaffii (strain GS115 / ATCC 20864) OX=644223 GN=PAS_chr3_0419 PE=3 SV=1
22	36	F2QXH5	89.5	12	12	8.5E7	0.0180851	3	3	4	Carbamidomethylation	31886	Extracellular protein X1 OS=Komagataella phaffii (strain ATCC 76273 / CBS 7435 / CECT 11047 / NRRL Y-11430 / Wegner 21-1) OX=981350 GN=EPX1 PE=4 SV=1
22	35	C4R3H3	89.5	12	12	8.5E7	0.0180851	3	3	4	Carbamidomethylation	31886	SCP domain-containing protein OS=Komagataella phaffii (strain GS115 / ATCC 20864) OX=644223 GN=PAS_chr3_0076 PE=4 SV=1
74	21	C4R2L8	87.04	9	9	4.83E6	0.00102766	3	3	4	Carbamidomethylation	50881	L-type lectin-like domain-containing protein OS=Komagataella phaffii (strain GS115 / ATCC 20864) OX=644223 GN=PAS_chr2-2_0178 PE=4 SV=1
74	22	F2QR56	87.04	9	9	4.83E6	0.00102766	3	3	4	Carbamidomethylation	50881	L-type lectin-like domain-containing protein OS=Komagataella phaffii (strain ATCC 76273 / CBS 7435 / CECT 11047 / NRRL Y-11430 / Wegner 21-1) OX=981350 GN=PP7435_Chr2-0187 PE=4 SV=1
254	25	F2QSQ9	79.3	10	10	3.67E6	0.000780851	2	2	2	Carbamidomethylation	23657	Uncharacterized protein OS=Komagataella phaffii (strain ATCC 76273 / CBS 7435 / CECT 11047 / NRRL Y-11430 / Wegner 21-1) OX=981350 GN=PP7435_Chr2-0752 PE=4 SV=1
254	26	C4R0Z8	79.3	10	10	3.67E6	0.000780851	2	2	2	Carbamidomethylation	23657	Uncharacterized protein OS=Komagataella phaffii (strain GS115 / ATCC 20864) OX=644223 GN=PAS_chr2-1_0539 PE=4 SV=1
63	2677	C4R325	48.14	1	1	1.02E7	0.00217021	2	2	2		250315	AP-1 accessory protein OS=Komagataella phaffii (strain GS115 / ATCC 20864) OX=644223 GN=PAS_chr2-2_0037 PE=4 SV=1
63	2678	F2QQQ5	48.14	1	1	1.02E7	0.00217021	2	2	2		251425	AP-1 accessory protein 1 OS=Komagataella phaffii (strain ATCC 76273 / CBS 7435 / CECT 11047 / NRRL Y-11430 / Wegner 21-1) OX=981350 GN=LAA1 PE=4 SV=1
81	66	|#CONTAM#KRHB4_HUMAN|	56.11	2	2			2	0	3		64895	sp|#CONTAM#KRHB4_HUMAN|
5	50	|#CONTAM#TRFE_HUMAN|	50.31	1	1			1	0	3		77050	sp|#CONTAM#TRFE_HUMAN|
160	5623	|#CONTAM#ALBU_BOVIN|	44.13	2	2	4.73E5		1	1	1		69294	sp|#CONTAM#ALBU_BOVIN|
165	234	|#CONTAM#KRHB3_HUMAN|	38.66	1	1			1	0	1		54214	sp|#CONTAM#KRHB3_HUMAN|
133	58	|#CONTAM#RS27A_HUMAN|	38.66	6	6	8.22E5		1	1	2		17965	sp|#CONTAM#RS27A_HUMAN|
150	682	|#CONTAM#KRHB1_HUMAN|	37.34	1	1			1	0	1		54971	sp|#CONTAM#KRHB1_HUMAN|
124	988	|#CONTAM#ANT3_HUMAN|	28.75	0	0			0	0	0		52602	sp|#CONTAM#ANT3_HUMAN|
865	1729	|#CONTAM#BGAL_ECOLI|	22.1	0	0			0	0	0		116483	sp|#CONTAM#BGAL_ECOLI|
